# Supplementary material for: Power analysis for RNA-Seq differential expression studies
Source: PubMed Central journal article supplement (PMC5415728; doi:10.1186/s12859-017-1648-2), 2017-05-03
Supplement: 12859_2017_1648_MOESM1_ESM.pdf [file 12859_2017_1648_MOESM1_ESM.pdf]

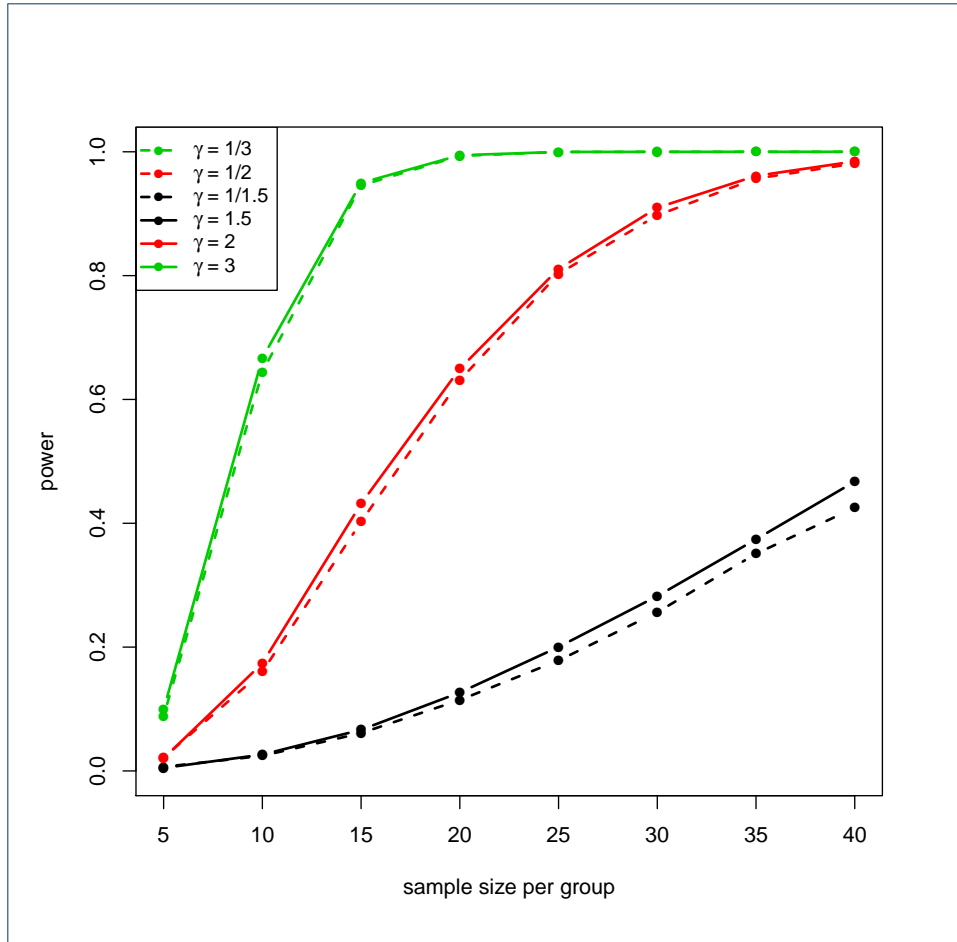

**Figure S1: Power plot at  $\mu = 100$  for the LRT with equal dispersion parameters.** Power was calculated at 8 different sample sizes and 6 different fold changes under the alternative hypothesis with  $\mu = 100$  and  $\alpha = 0.001$ . Power is higher for larger sample sizes and higher absolute fold changes.

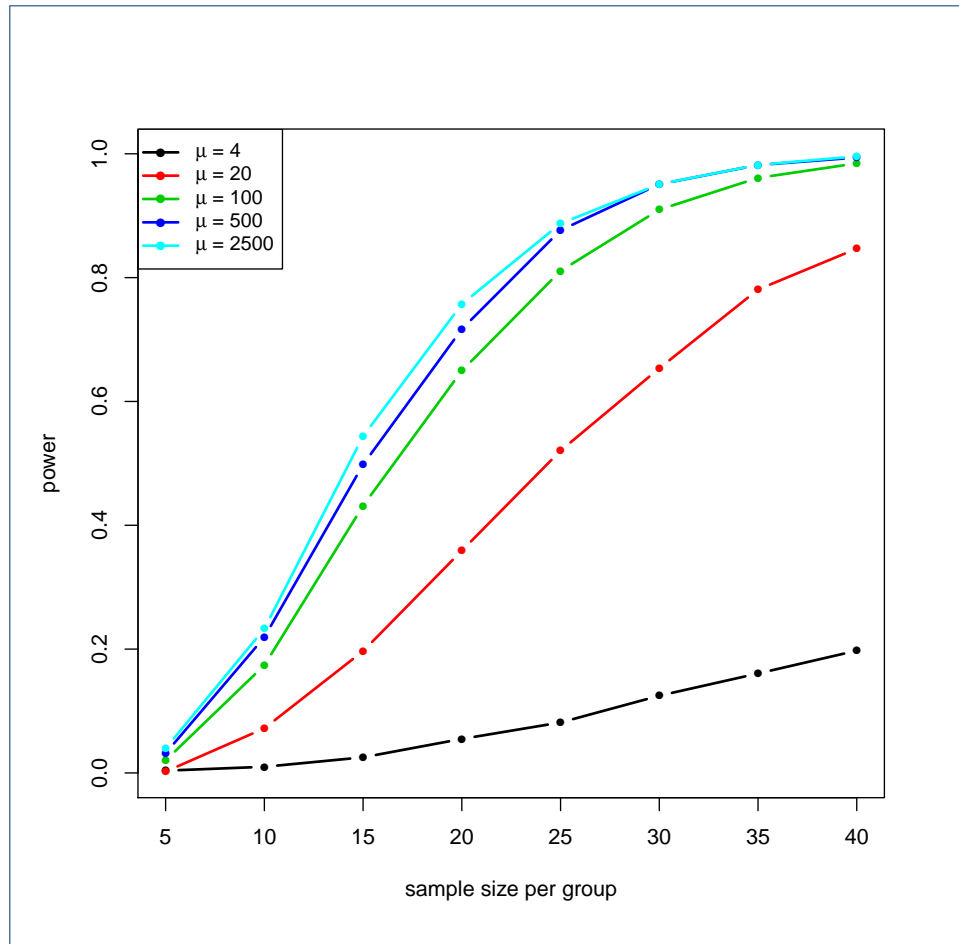

**Figure S2: Power plot at  $\gamma = 2$  for the LRT with equal dispersion parameters.** Power was calculated at 8 different sample sizes and 5 different expression levels with  $\gamma = 2$  under the alternative hypothesis and  $\alpha = 0.001$ . Power is higher for larger sample sizes and higher expression levels.

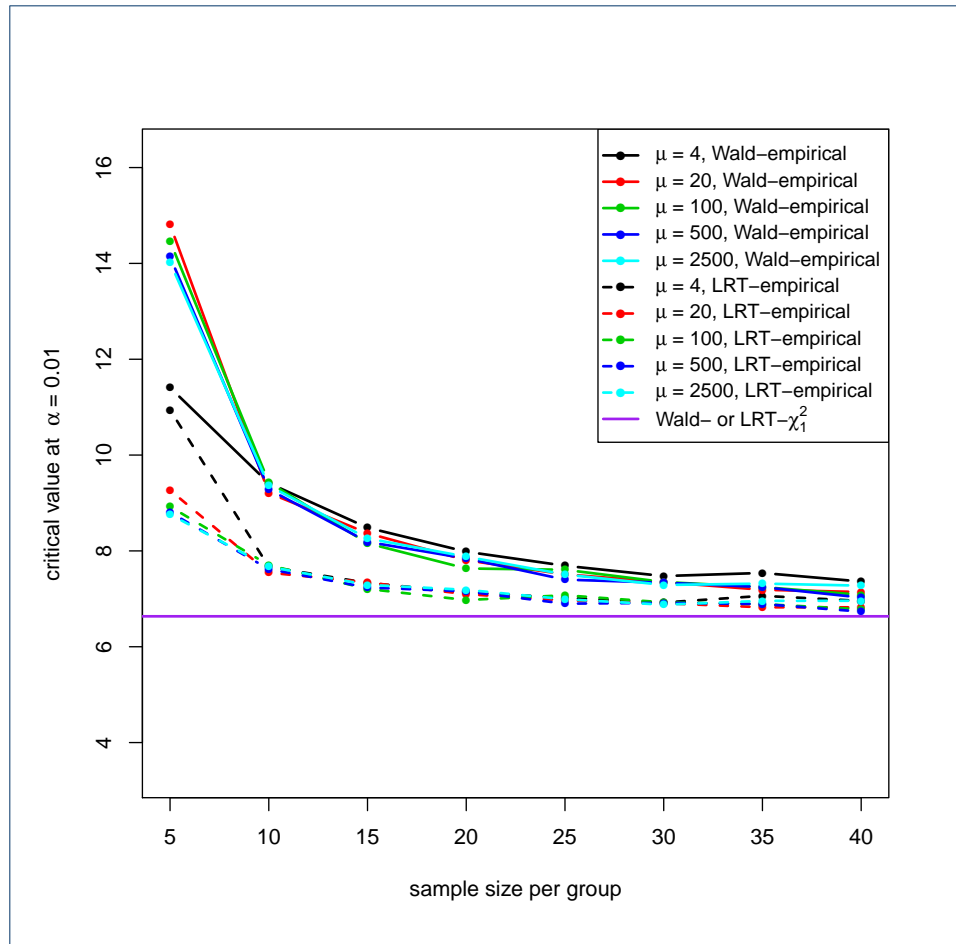

**Figure S3: Critical values plot for both Wald test and LRT with equal dispersion parameters at  $\alpha = 0.01$ .** Critical values were calculated at the nominal false positive error rate of 0.01 from empirical percentile of null statistics at 5 different mean expression levels for both Wald test (solid line) and LRT (dashed line), and for the chi-square distribution with 1 degree of freedom (purple line). Both Wald test and LRT with the empirical distribution have larger critical values than both Wald test and LRT with the chi-square distribution.

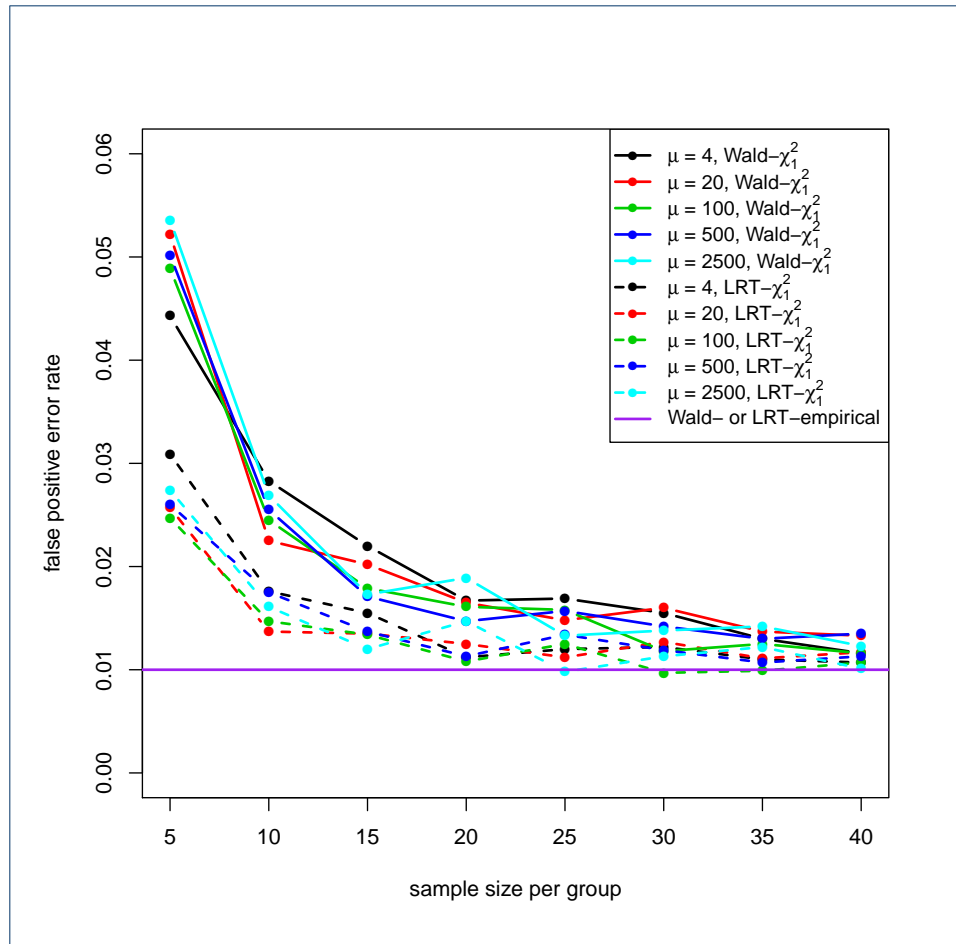

**Figure S4: False positive error rate plot for both Wald test and LRT with equal dispersion parameters at  $\alpha = 0.01$ .** False positive error rate was calculated for both Wald test (solid line) and LRT (dashed line) following a chi-square distribution with 1 degree of freedom at 5 different mean expression levels. The nominal false positive error rate for both Wald and LRT with the empirical distribution is shown in purple line ( $\alpha = 0.01$ ). Both tests with the chi-square distribution have the inflated false positive error rates.

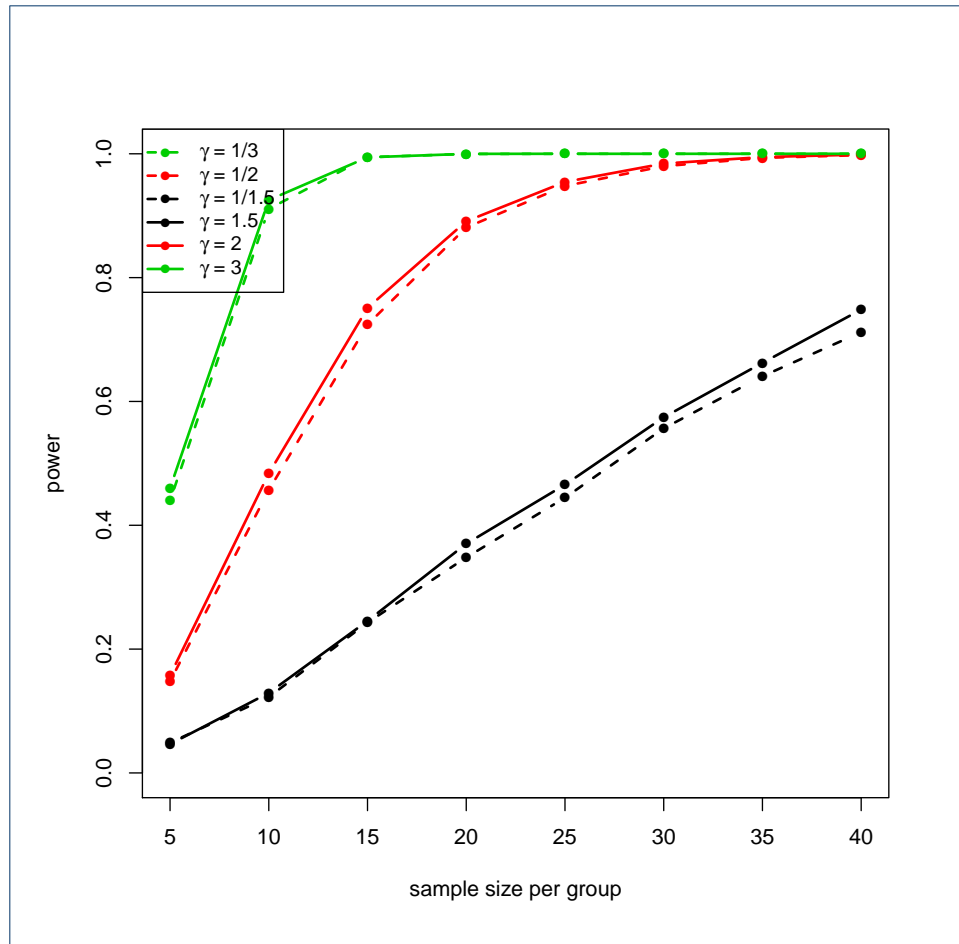

**Figure S5: Power plot at  $\mu = 100$  for the Wald test with equal dispersion parameters at  $\alpha = 0.01$ .** Power was calculated at 8 different sample sizes and 6 different fold changes under the alternative hypothesis with  $\mu = 100$  and  $\alpha = 0.01$ . Power is higher for larger sample sizes and higher absolute fold changes.

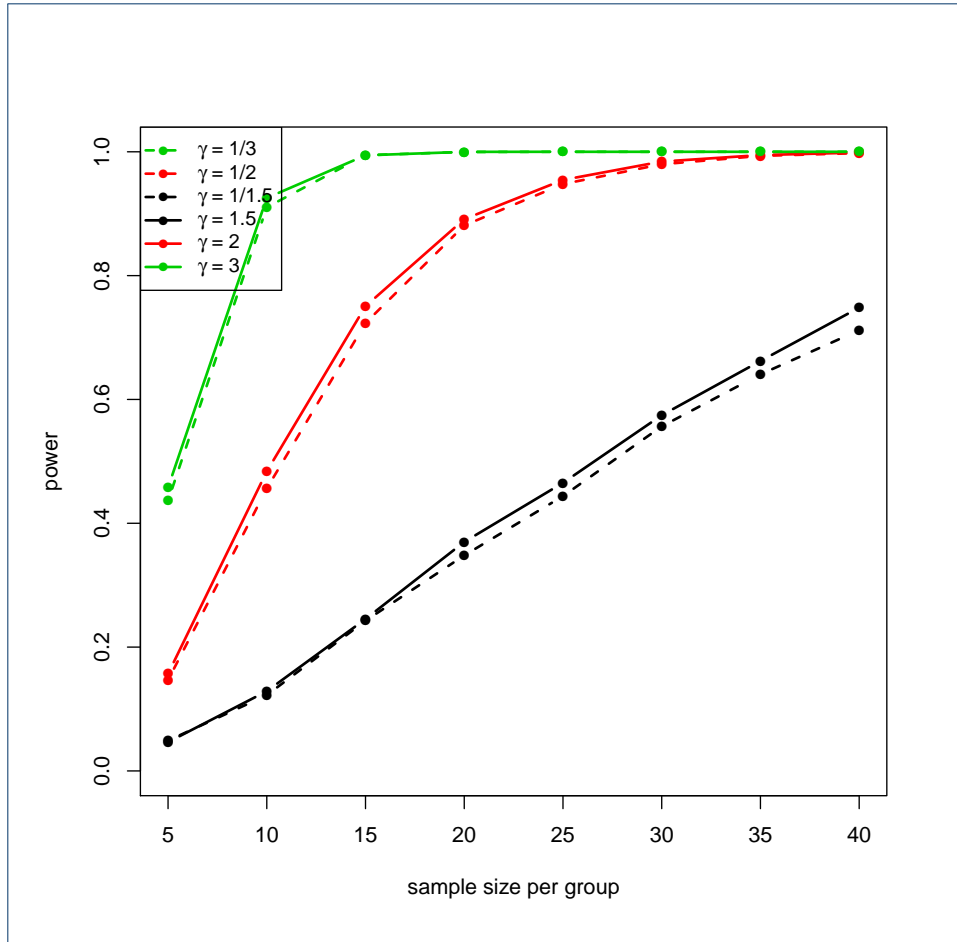

**Figure S6: Power plot at  $\mu = 100$  for the LRT with equal dispersion parameters at  $\alpha = 0.01$ .** Power was calculated at 8 different sample sizes and 6 different fold changes under the alternative hypothesis with  $\mu = 100$  and  $\alpha = 0.01$ . Power is higher for larger sample sizes and higher absolute fold changes.

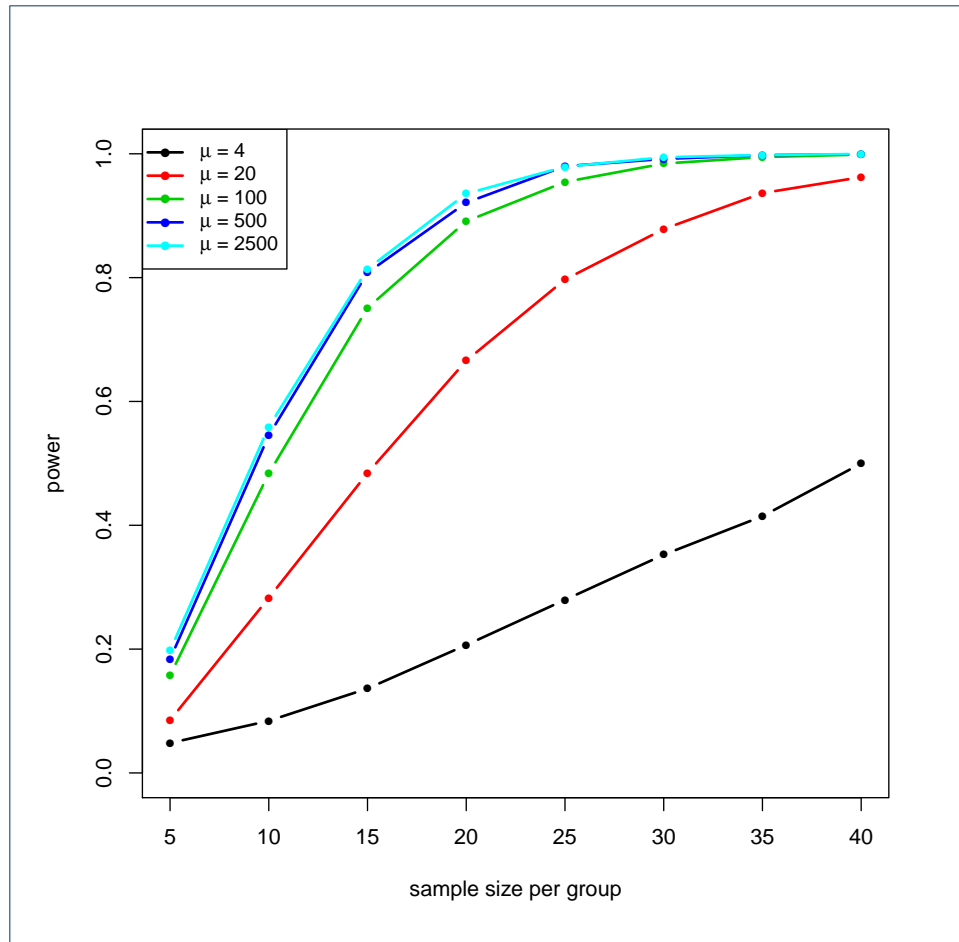

**Figure S7: Power plot at  $\gamma = 2$  for the Wald test with equal dispersion parameters at  $\alpha = 0.01$ .** Power was calculated at 8 different sample sizes and 5 different expression levels with  $\gamma = 2$  under the alternative hypothesis and  $\alpha = 0.01$ . Power is higher for larger sample sizes and higher expression levels.

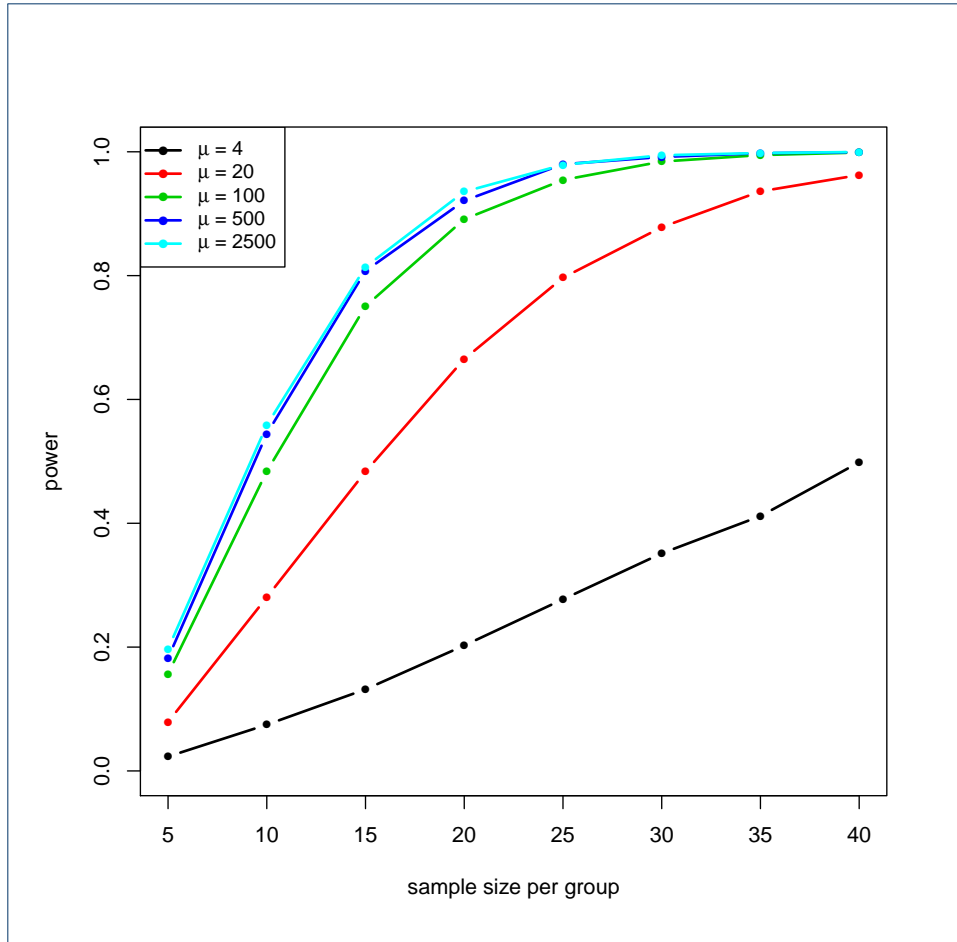

**Figure S8: Power plot at  $\gamma = 2$  for the LRT with equal dispersion parameters at  $\alpha = 0.01$ .** Power was calculated at 8 different sample sizes and 5 different expression levels with  $\gamma = 2$  under the alternative hypothesis and  $\alpha = 0.01$ . Power is higher for larger sample sizes and higher expression levels.



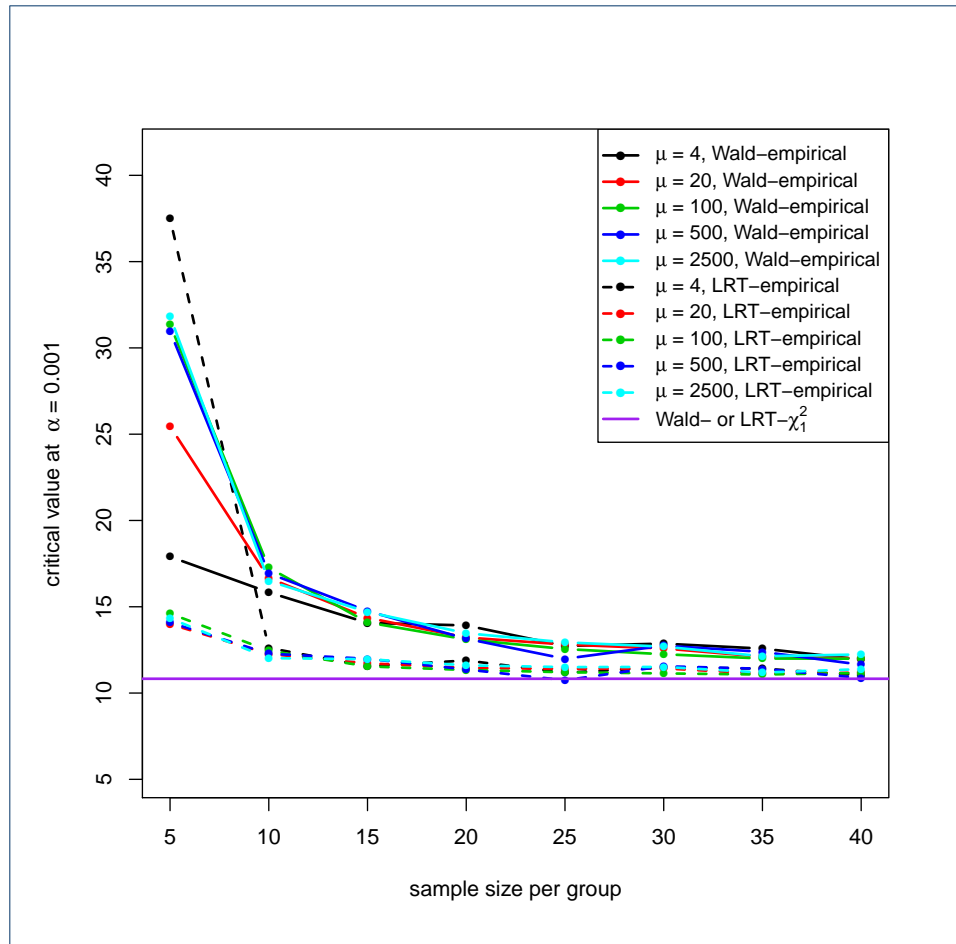

**Figure S9: Critical values plot for both Wald test and LRT with equal dispersion parameters assuming the high dependency functional form.** Critical values were calculated at the nominal false positive error rate of 0.001 from empirical percentile of null statistics at 5 different mean expression levels for both Wald test (solid line) and LRT (dashed line), and for the chi-square distribution with 1 degree of freedom (purple line). Both Wald test and LRT with the empirical distribution have larger critical values than both Wald test and LRT with the chi-square distribution.

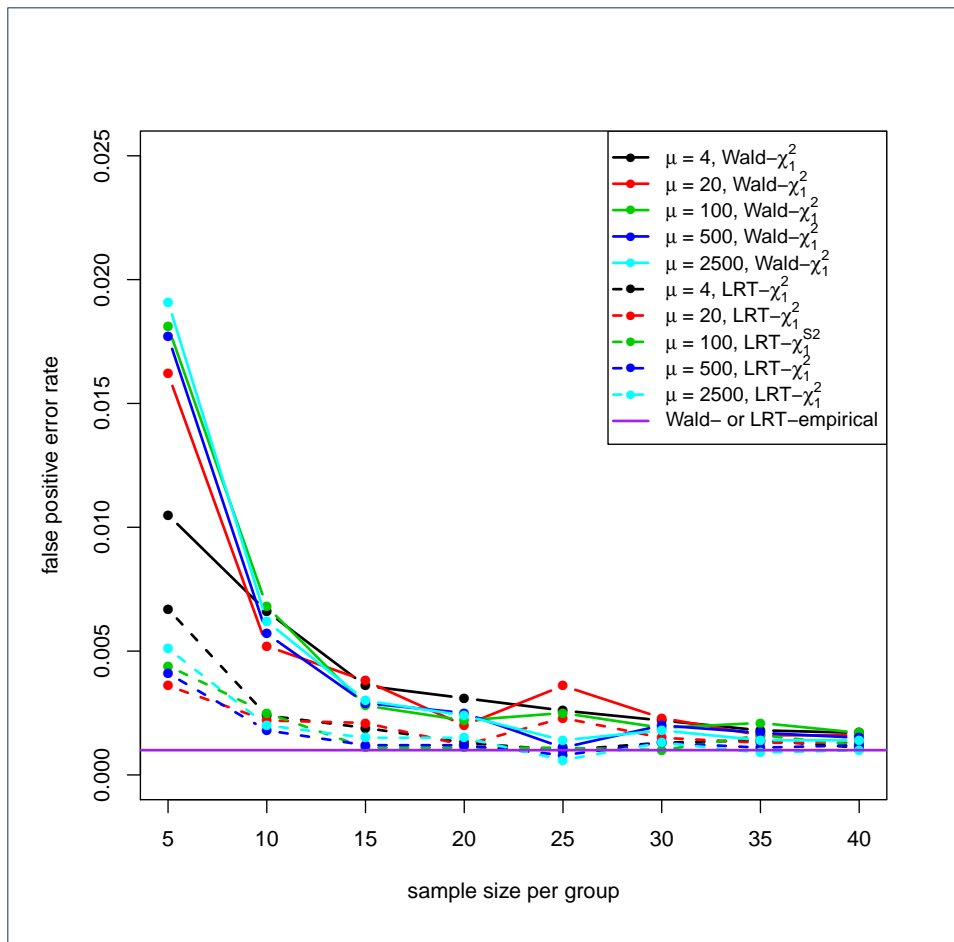

**Figure S10: False positive error rate plot for both Wald test and LRT with equal dispersion parameters assuming the high dependency functional form.** False positive error rate was calculated for both Wald test (solid line) and LRT (dashed line) following a chi-square distribution with 1 degree of freedom at 5 different mean expression levels. The nominal false positive error rate for both Wald and LRT with the empirical distribution is shown in purple line ( $\alpha = 0.001$ ). Both tests with the chi-square distribution have the inflated false positive error rates.

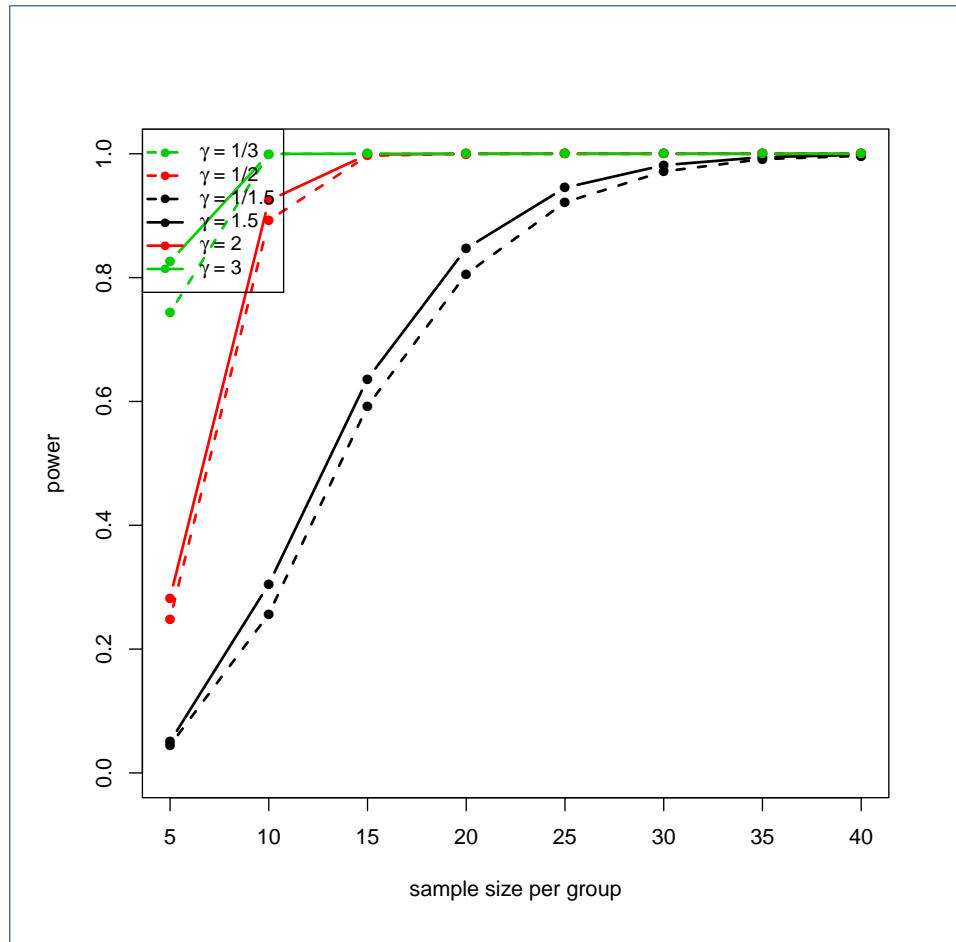

**Figure S11: Power plot at  $\mu = 100$  for the Wald test with equal dispersion parameters assuming the high dependency functional form.** Power was calculated at 8 different sample sizes and 6 different fold changes under the alternative hypothesis with  $\mu = 100$  and  $\alpha = 0.001$ . Power is higher for larger sample sizes and higher absolute fold changes.

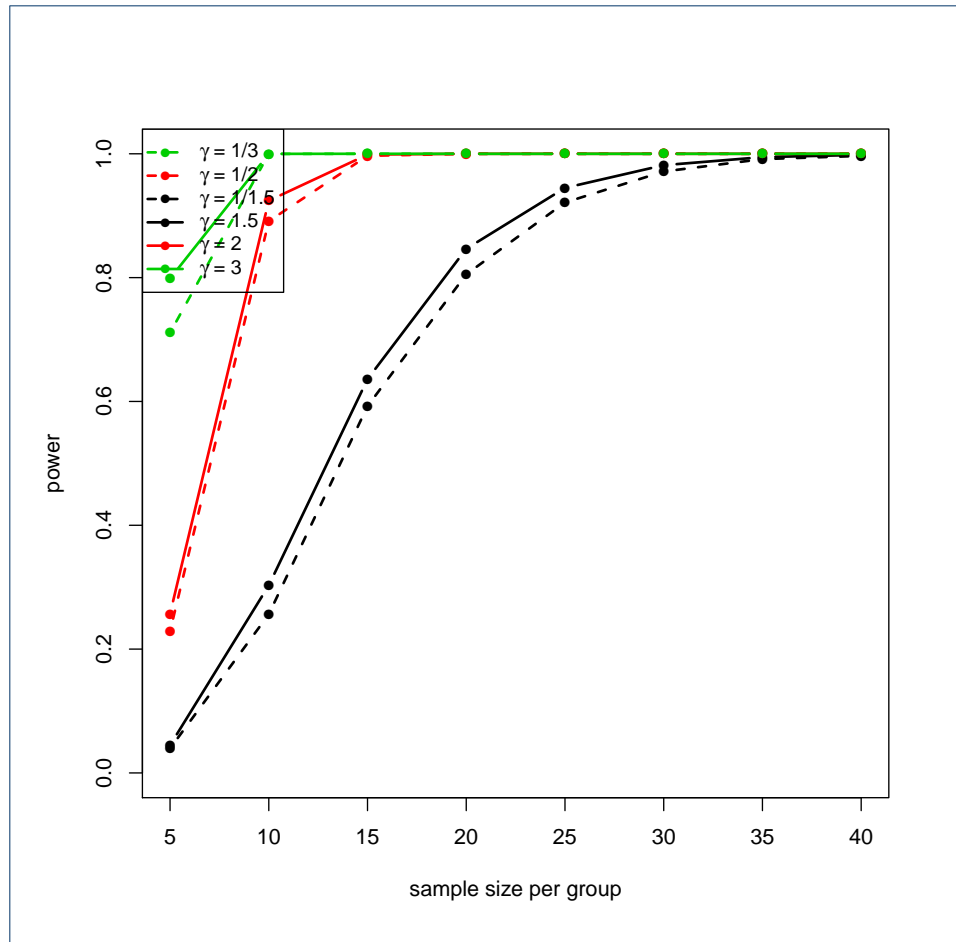

**Figure S12: Power plot at  $\mu = 100$  for the LRT with equal dispersion parameters assuming the high dependency functional form.** Power was calculated at 8 different sample sizes and 6 different fold changes under the alternative hypothesis with  $\mu = 100$  and  $\alpha = 0.001$ . Power is higher for larger sample sizes and higher absolute fold changes.

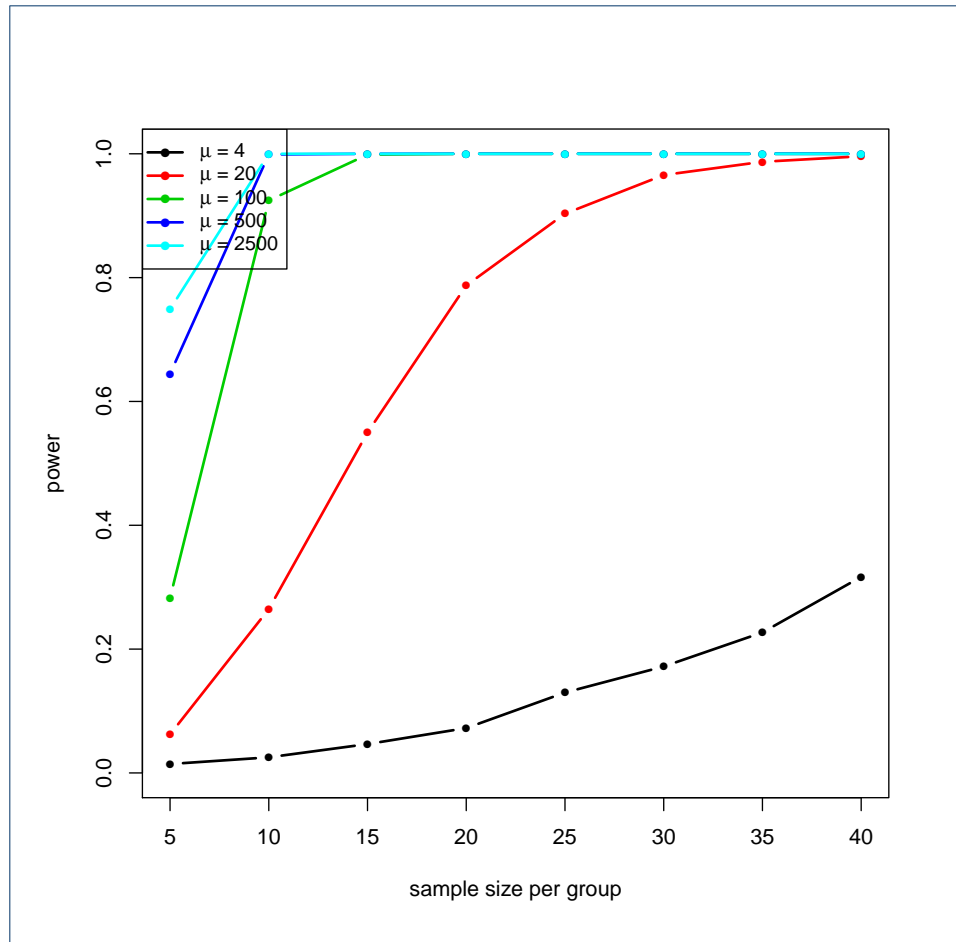

**Figure S13: Power plot at  $\gamma = 2$  for the Wald test with equal dispersion parameters assuming the high dependency functional form.** Power was calculated at 8 different sample sizes and 5 different expression levels with  $\gamma = 2$  under the alternative hypothesis and  $\alpha = 0.001$ . Power is higher for larger sample sizes and higher expression levels.

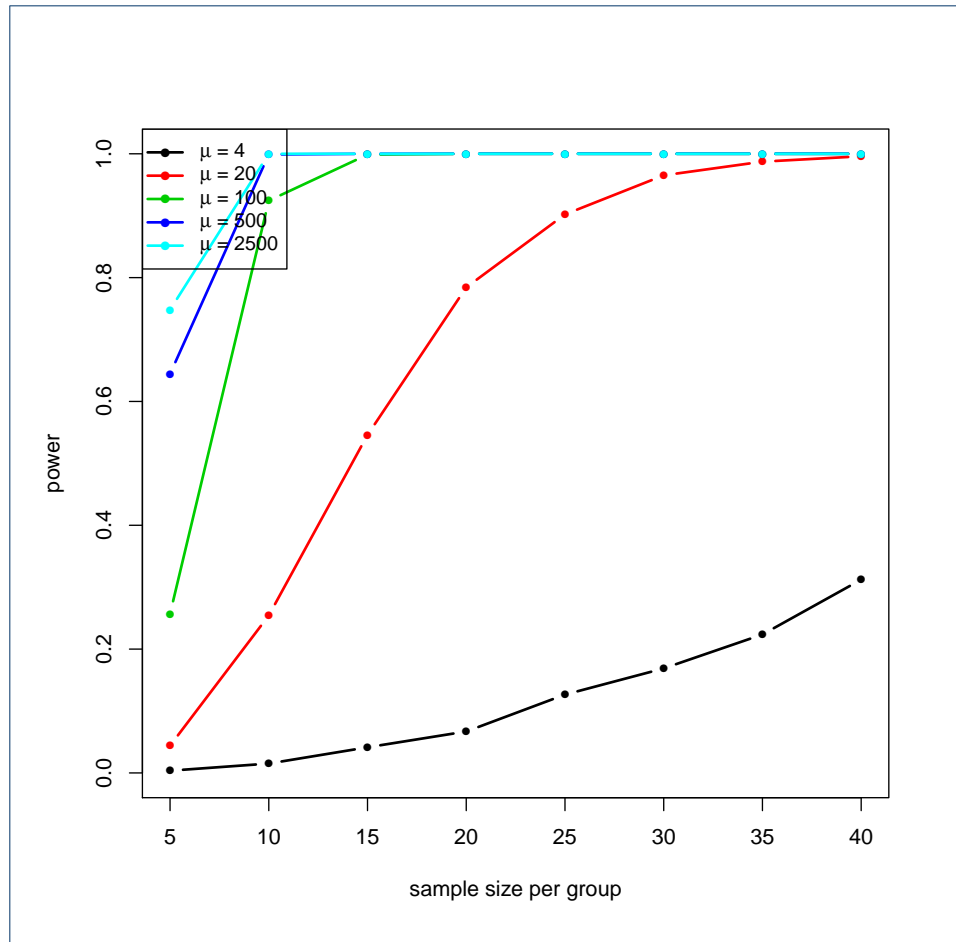

**Figure S14: Power plot at  $\gamma = 2$  for the LRT with equal dispersion parameters assuming the high dependency functional form.** Power was calculated at 8 different sample sizes and 5 different expression levels with  $\gamma = 2$  under the alternative hypothesis and  $\alpha = 0.001$ . Power is higher for larger sample sizes and higher expression levels.

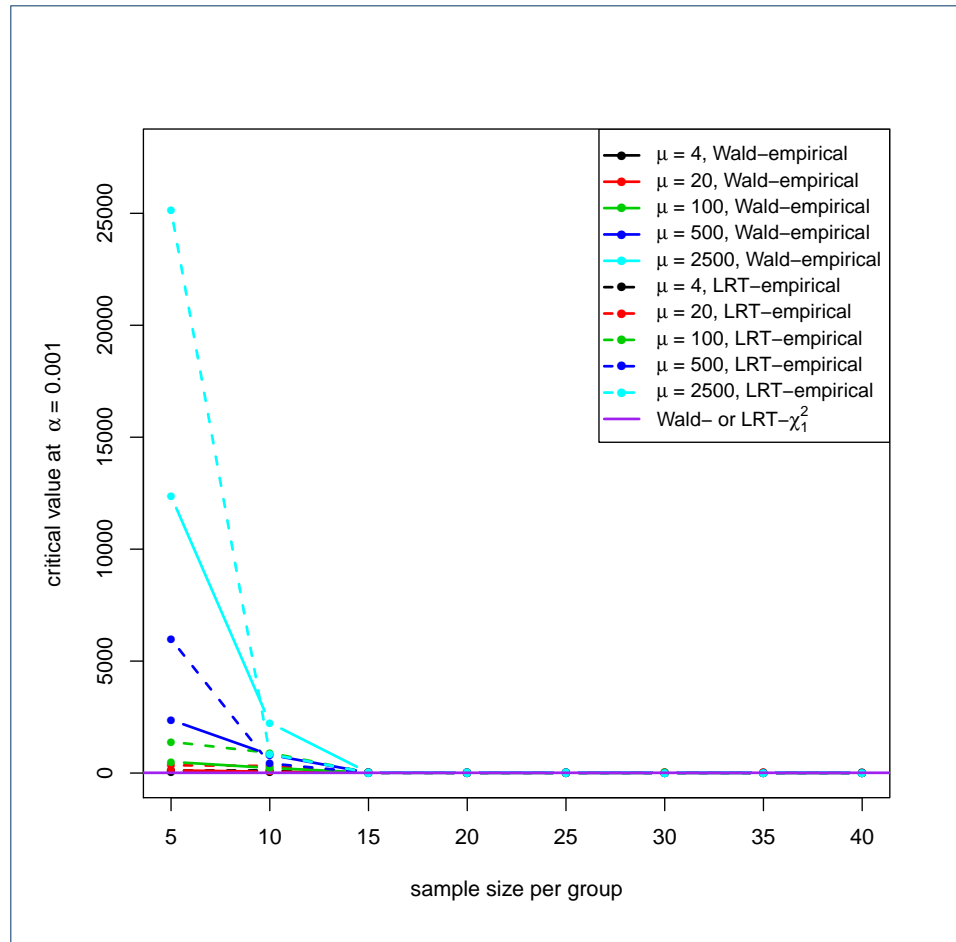

**Figure S15: Critical values plot for both Wald test and LRT with equal dispersion parameters assuming the low dependency functional form.** Critical values were calculated at the nominal false positive error rate of 0.001 from empirical percentile of null statistics at 5 different mean expression levels for both Wald test (solid line) and LRT (dashed line), and for the chi-square distribution with 1 degree of freedom (purple line). Both Wald test and LRT with the empirical distribution have larger critical values than both Wald test and LRT with the chi-square distribution.

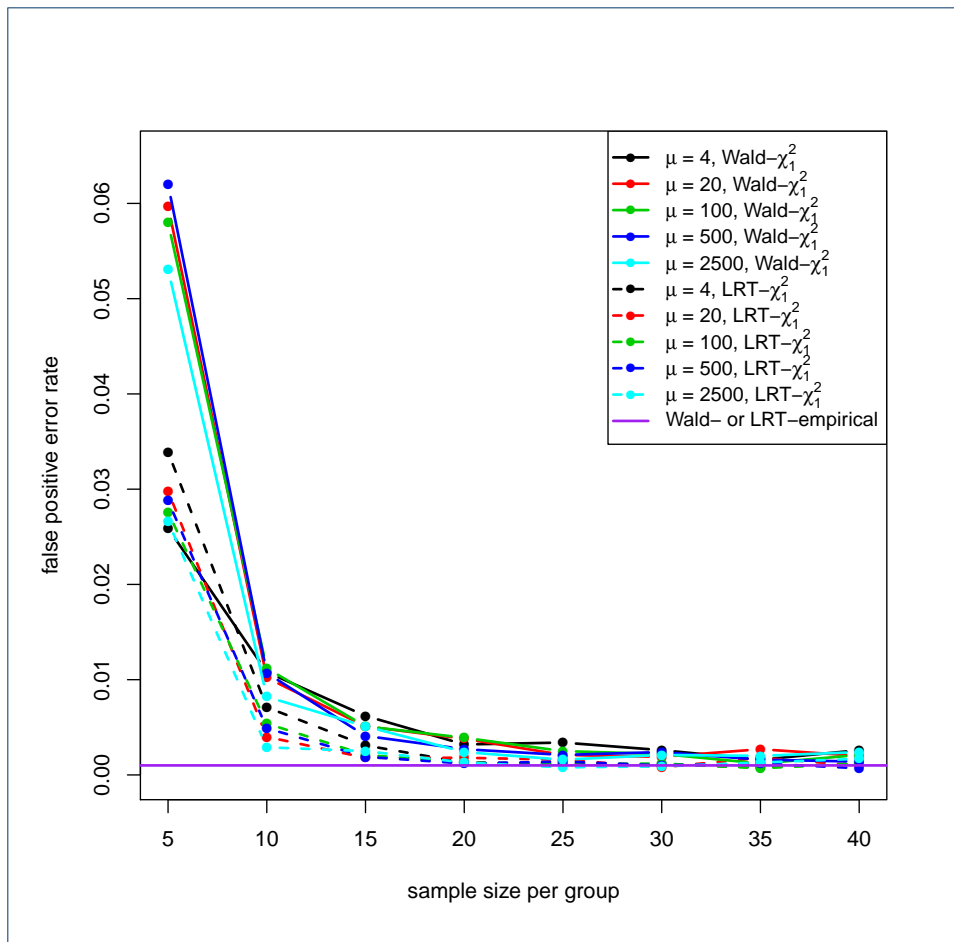

**Figure S16: False positive error rate plot for both Wald test and LRT with equal dispersion parameters assuming the low dependency functional form.** False positive error rate was calculated for both Wald test (solid line) and LRT (dashed line) following a chi-square distribution with 1 degree of freedom at 5 different mean expression levels. The nominal false positive error rate for both Wald and LRT with the empirical distribution is shown in purple line ( $\alpha = 0.001$ ). Both tests with the chi-square distribution have the inflated false positive error rates.



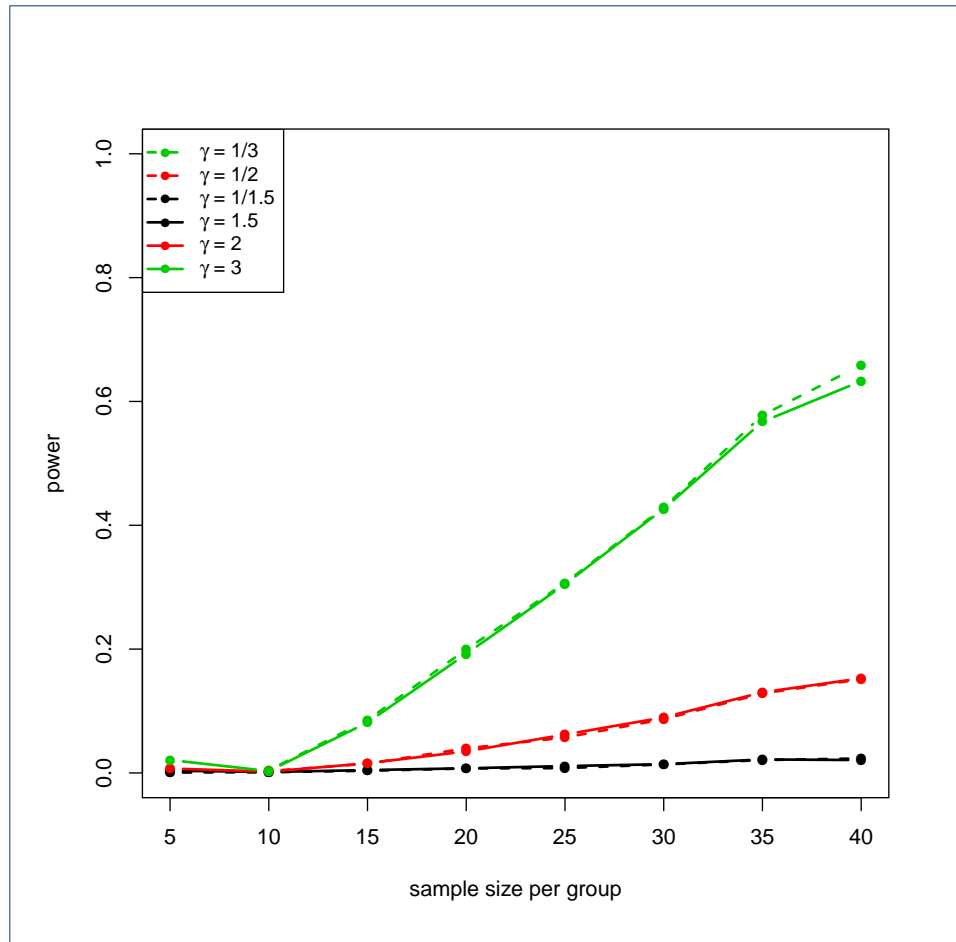

**Figure S17: Power plot at  $\mu = 100$  for the Wald test with equal dispersion parameters assuming the low dependency functional form.** Power was calculated at 8 different sample sizes and 6 different fold changes under the alternative hypothesis with  $\mu = 100$  and  $\alpha = 0.001$ . Power is higher for larger sample sizes and higher absolute fold changes.

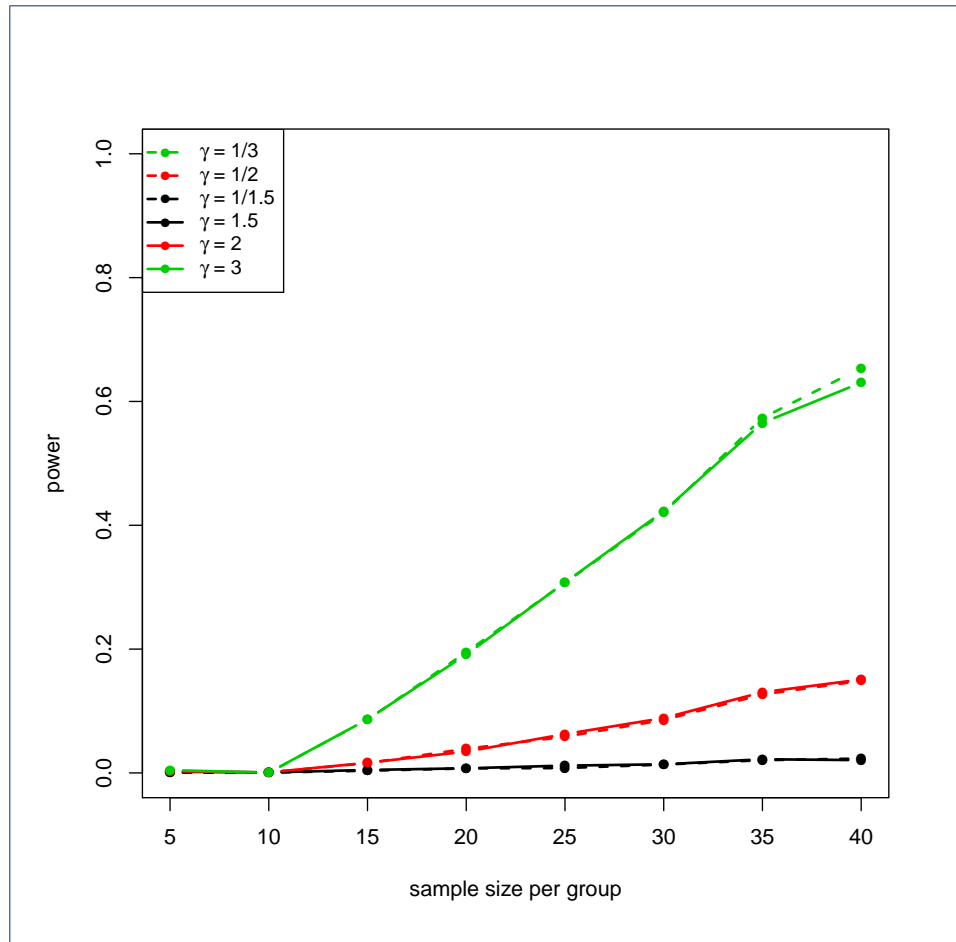

**Figure S18: Power plot at  $\mu = 100$  for the LRT with equal dispersion parameters assuming the low dependency functional form.** Power was calculated at 8 different sample sizes and 6 different fold changes under the alternative hypothesis with  $\mu = 100$  and  $\alpha = 0.001$ . Power is higher for larger sample sizes and higher absolute fold changes.

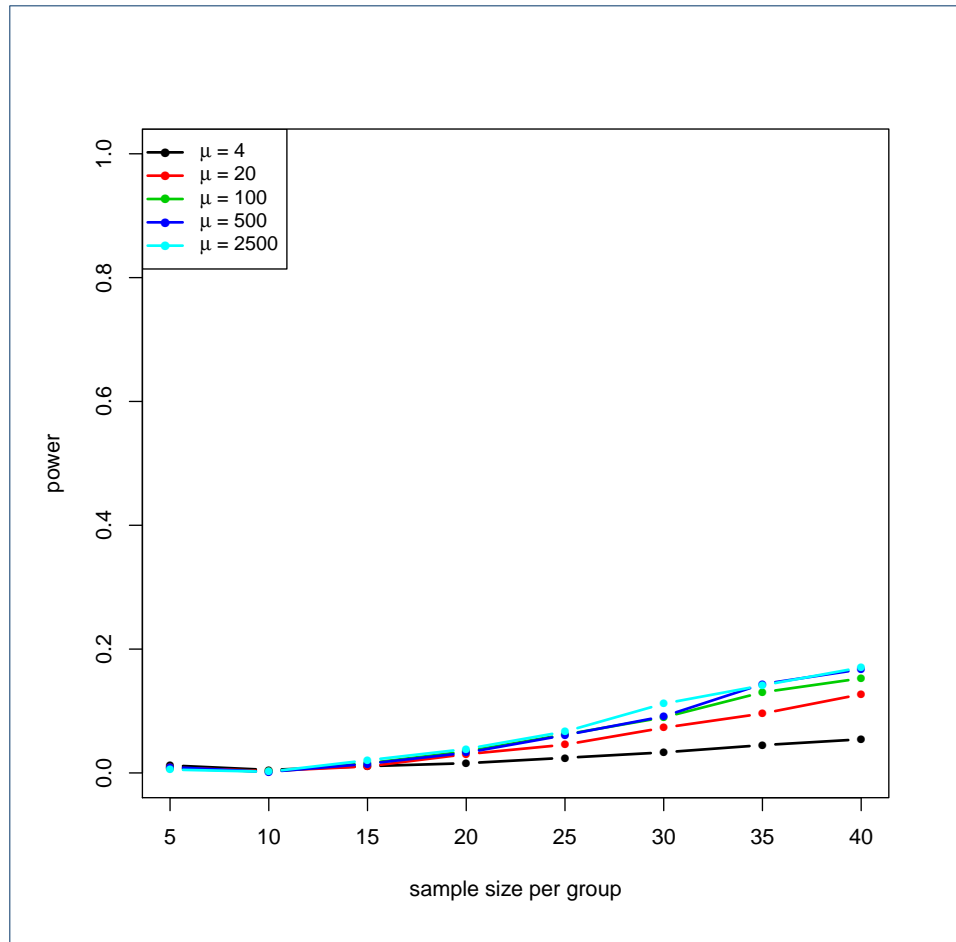

**Figure S19: Power plot at  $\gamma = 2$  for the Wald test with equal dispersion parameters assuming the low dependency functional form.** Power was calculated at 8 different sample sizes and 5 different expression levels with  $\gamma = 2$  under the alternative hypothesis and  $\alpha = 0.001$ . Power is higher for larger sample sizes and higher expression levels.

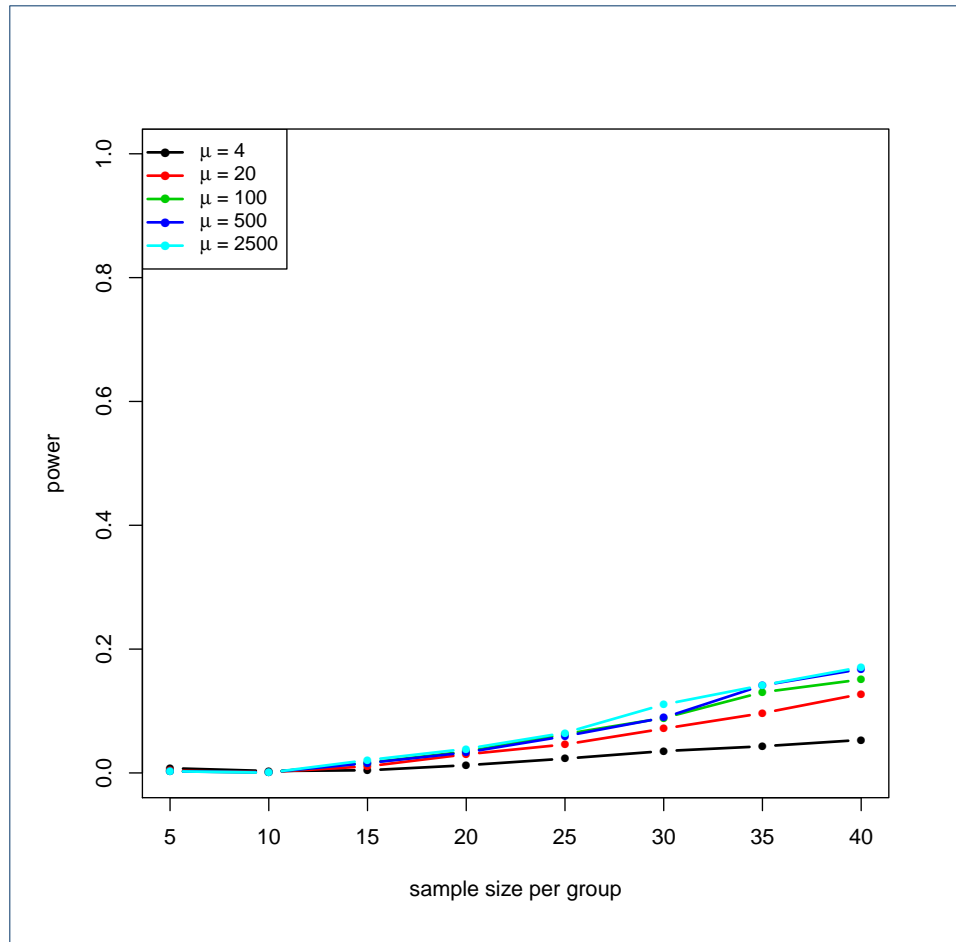

**Figure S20: Power plot at  $\gamma = 2$  for the LRT with equal dispersion parameters assuming the low dependency functional form.** Power was calculated at 8 different sample sizes and 5 different expression levels with  $\gamma = 2$  under the alternative hypothesis and  $\alpha = 0.001$ . Power is higher for larger sample sizes and higher expression levels.

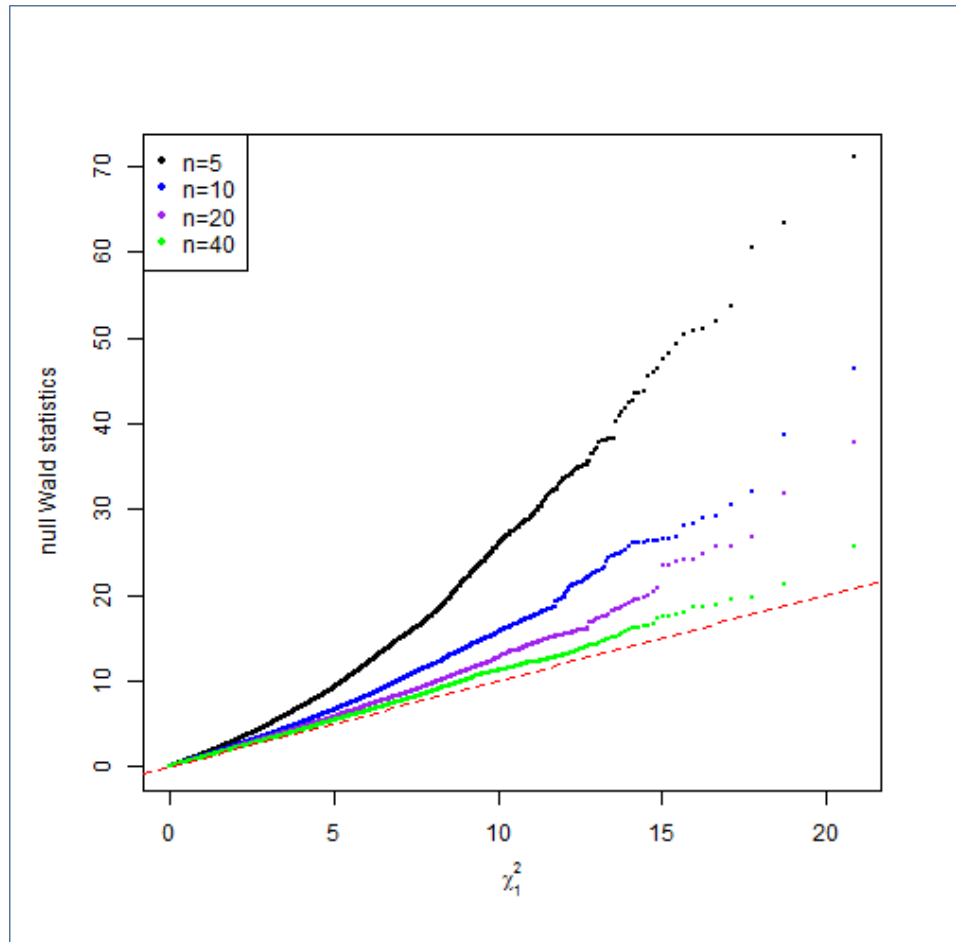

**Figure S21: QQ plot of null Wald statistics with unequal dispersion parameters.** Data were simulated 100,000 times with  $\mu = 20$  under the null hypothesis. Sample sizes were set at  $n = 5, 10, 20,$  and  $40$ . Wald test was used for testing mean difference between two conditions. The discrepancy of null Wald statistics from chi-square distribution with 1 degree of freedom is getting smaller with sample size increases.

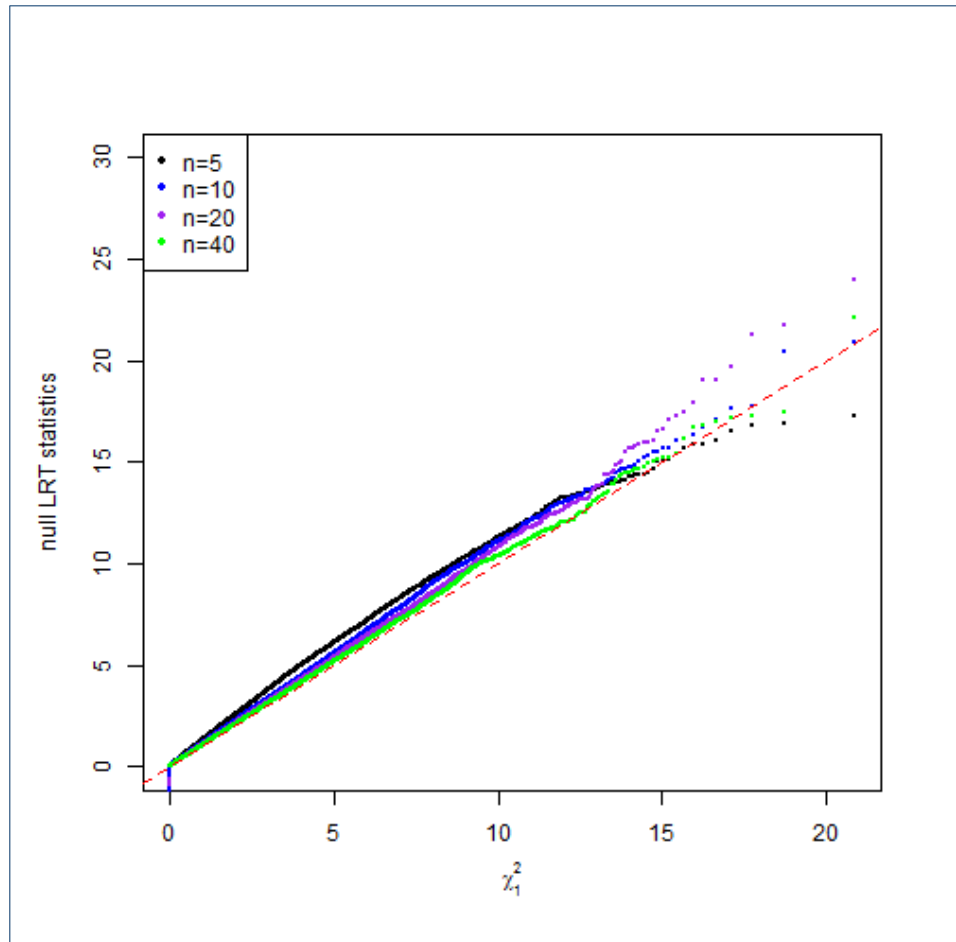

**Figure S22: QQ plot of null LRT statistics with unequal dispersion parameters.** Data were simulated 100,000 times with  $\mu = 20$  under the null hypothesis. Sample sizes were set at  $n = 5, 10, 20,$  and  $40$ . The LRT was used for testing mean difference between two conditions. The discrepancy of null LRT statistics from chi-square distribution with 1 degree of freedom is much smaller than the Wald test.

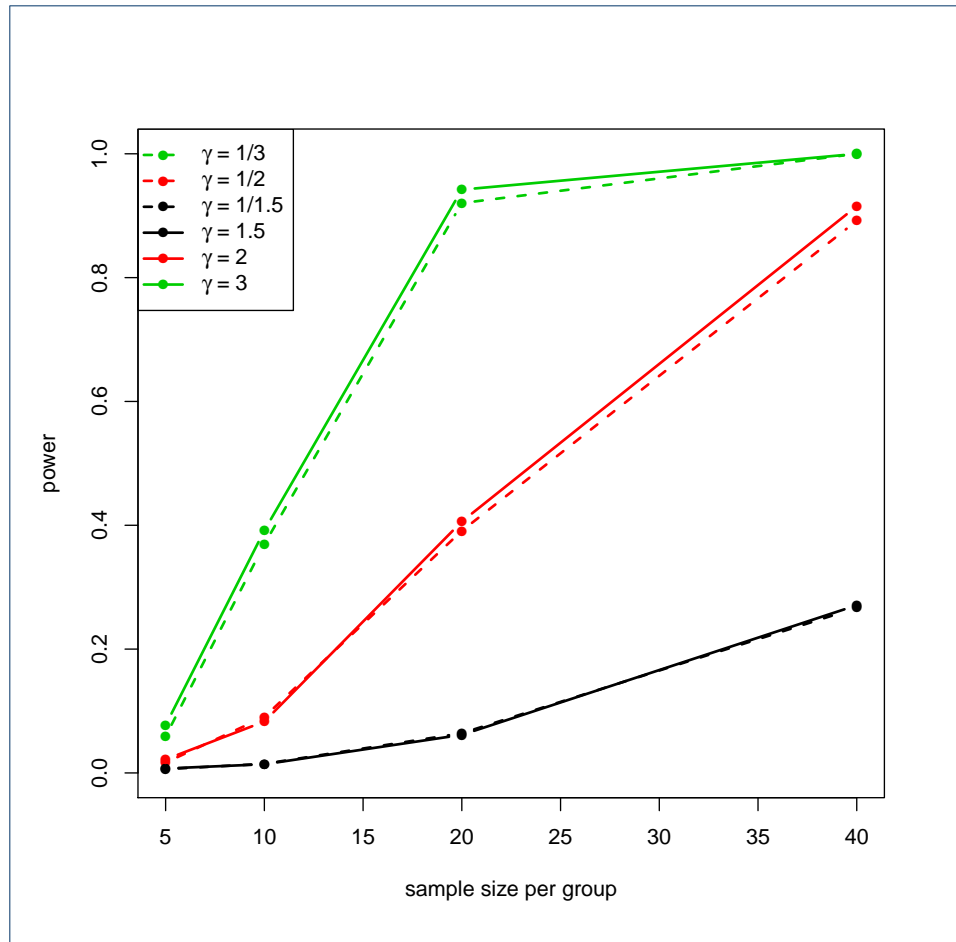

**Figure S23: Power plot at  $\mu = 20$  for the LRT with unequal dispersion parameters.** Power was calculated at 4 different sample sizes and 6 different fold changes under the alternative hypothesis with  $\mu = 20$  and  $\alpha = 0.001$ . Power is higher for larger sample sizes and higher absolute fold changes.

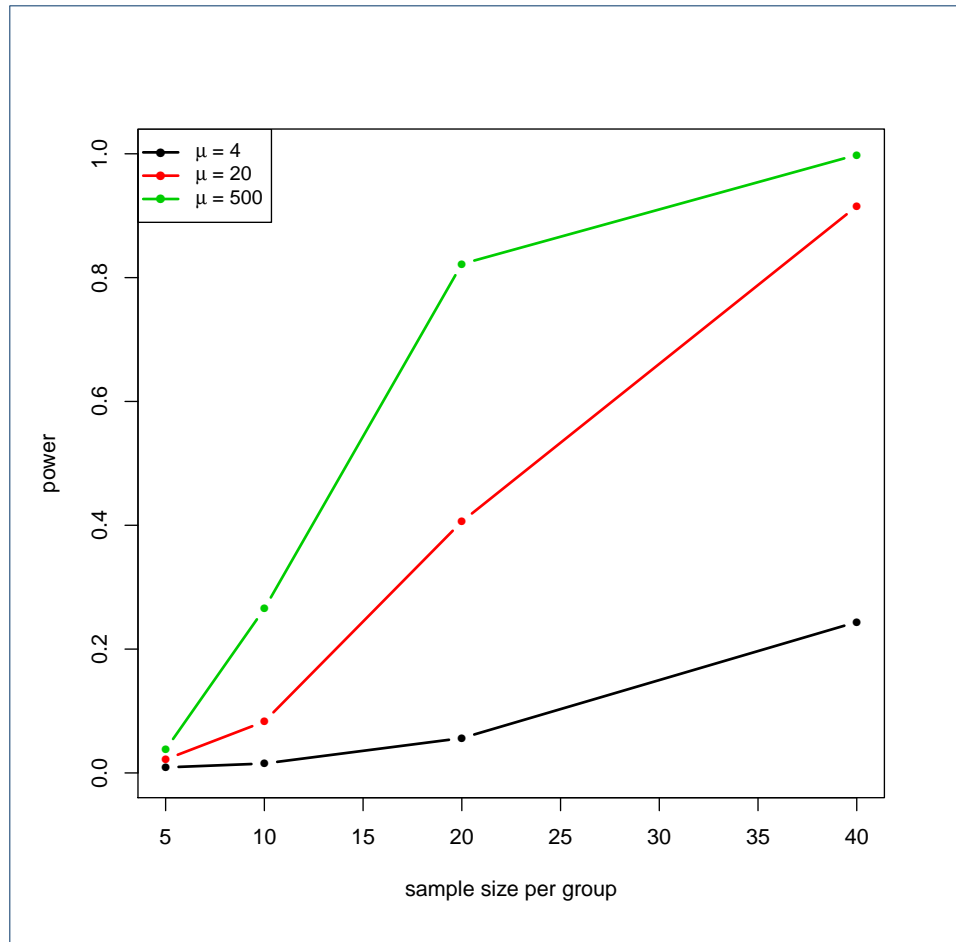

**Figure S24: Power plot at  $\gamma = 2$  for the LRT with unequal dispersion parameters.** Power was calculated at 4 different sample sizes and 3 different expression levels with  $\gamma = 2$  under the alternative hypothesis and  $\alpha = 0.001$ . Power is higher for larger sample sizes and higher expression levels.



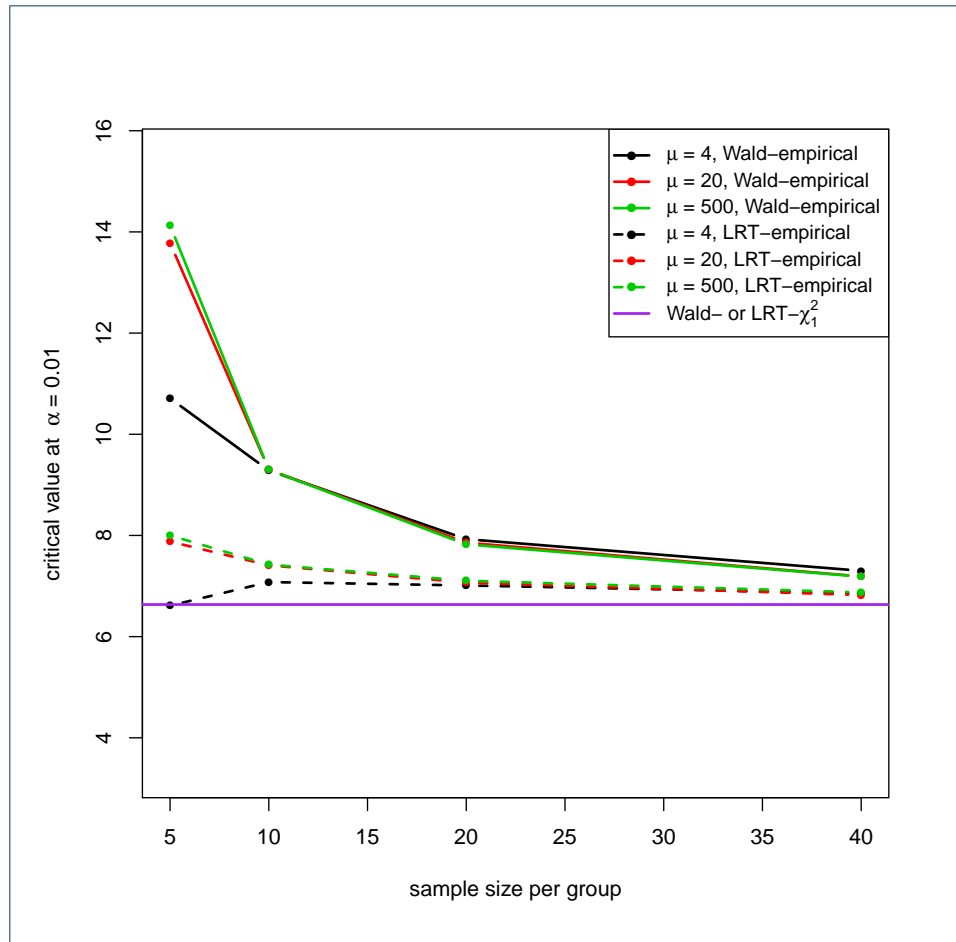

**Figure S25: Critical values plot for both Wald test and LRT with unequal dispersion parameters at  $\alpha = 0.01$ .** Critical values were calculated at the nominal false positive error rate of 0.01 from empirical percentile of null statistics at 3 different mean expression levels for both Wald test (solid line) and LRT (dashed line), and for the chi-square distribution with 1 degree of freedom (purple line). Both Wald test and LRT with the empirical distribution have larger critical values than both Wald test and LRT with the chi-square distribution.

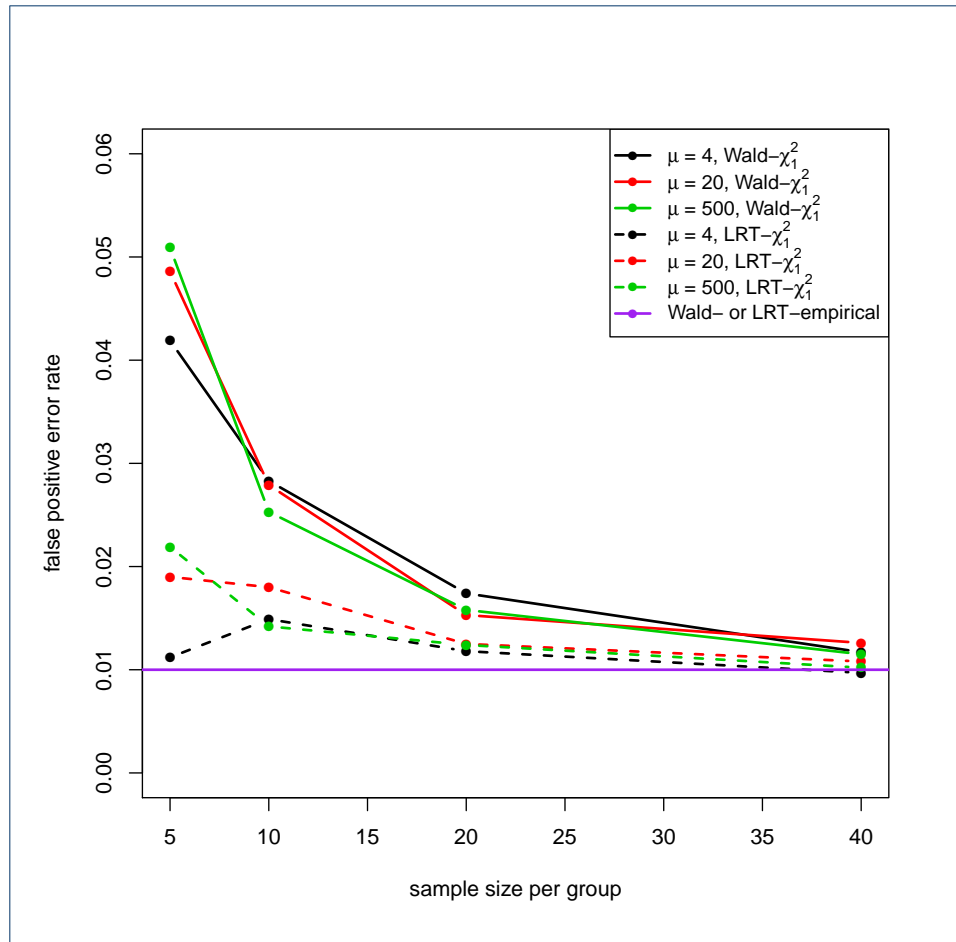

**Figure S26: False positive error rate plot for both Wald test and LRT with unequal dispersion parameters at  $\alpha = 0.01$ .** False positive error rate was calculated for both Wald test (solid line) and LRT (dashed line) following a chi-square distribution with 1 degree of freedom at 3 different mean expression levels. The nominal false positive error rate for both Wald and LRT with the empirical distribution is shown in purple line ( $\alpha = 0.01$ ). Both tests with the chi-square distribution have the inflated false positive error rates.

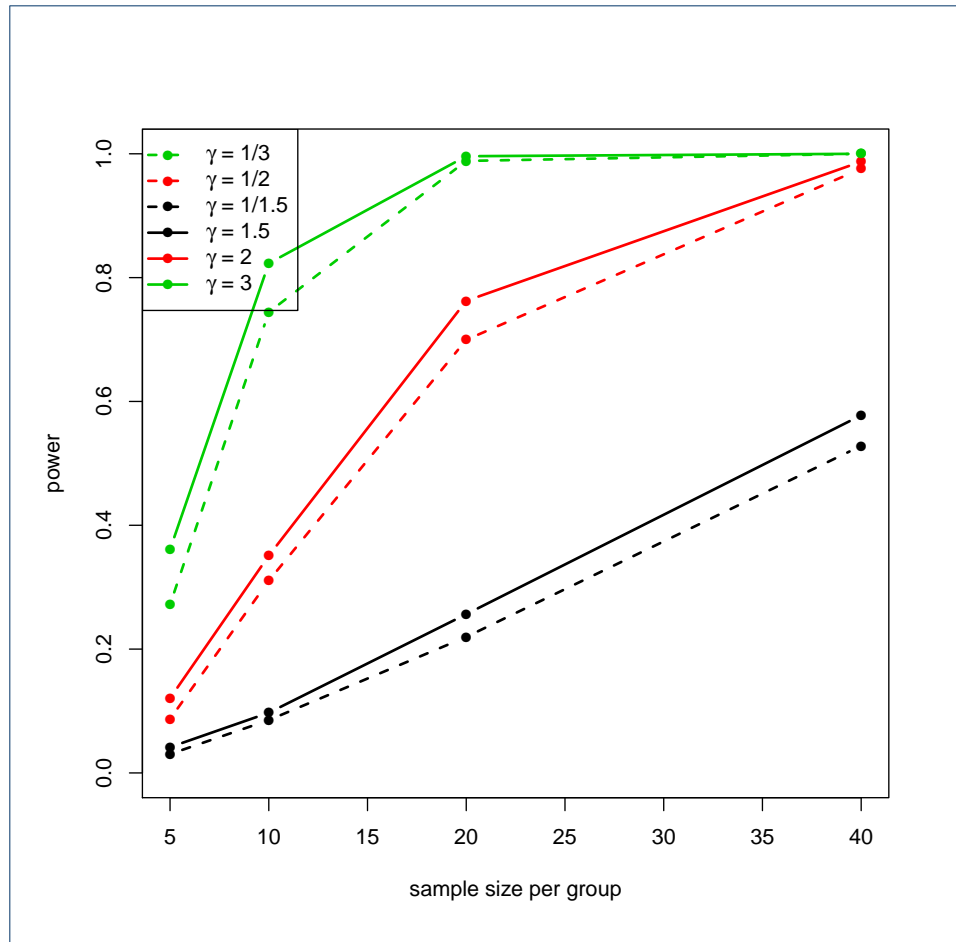

**Figure S27: Power plot at  $\mu = 20$  for the Wald test with unequal dispersion parameters at  $\alpha = 0.01$ .** Power was calculated at 4 different sample sizes and 6 different fold changes under the alternative hypothesis with  $\mu = 20$  and  $\alpha = 0.01$ . Power is higher for larger sample sizes and higher absolute fold changes.

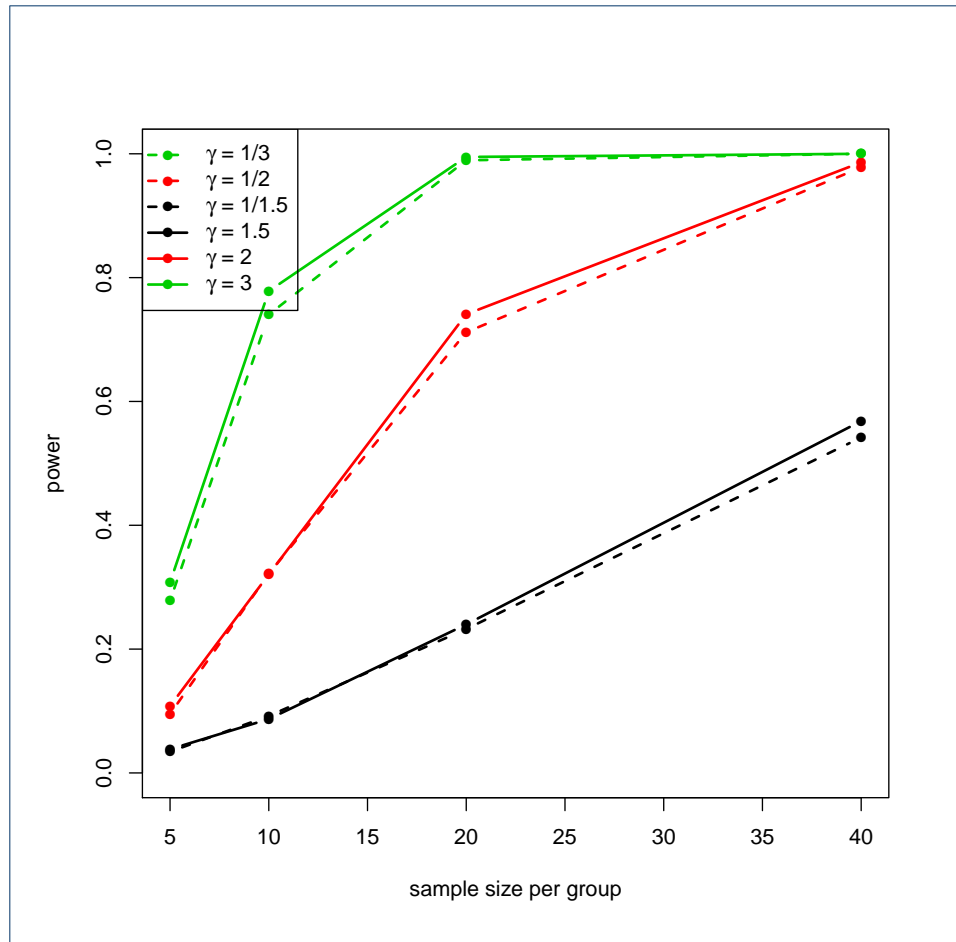

**Figure S28: Power plot at  $\mu = 20$  for the LRT with unequal dispersion parameters at  $\alpha = 0.01$ .** Power was calculated at 4 different sample sizes and 6 different fold changes under the alternative hypothesis with  $\mu = 20$  and  $\alpha = 0.01$ . Power is higher for larger sample sizes and higher absolute fold changes.

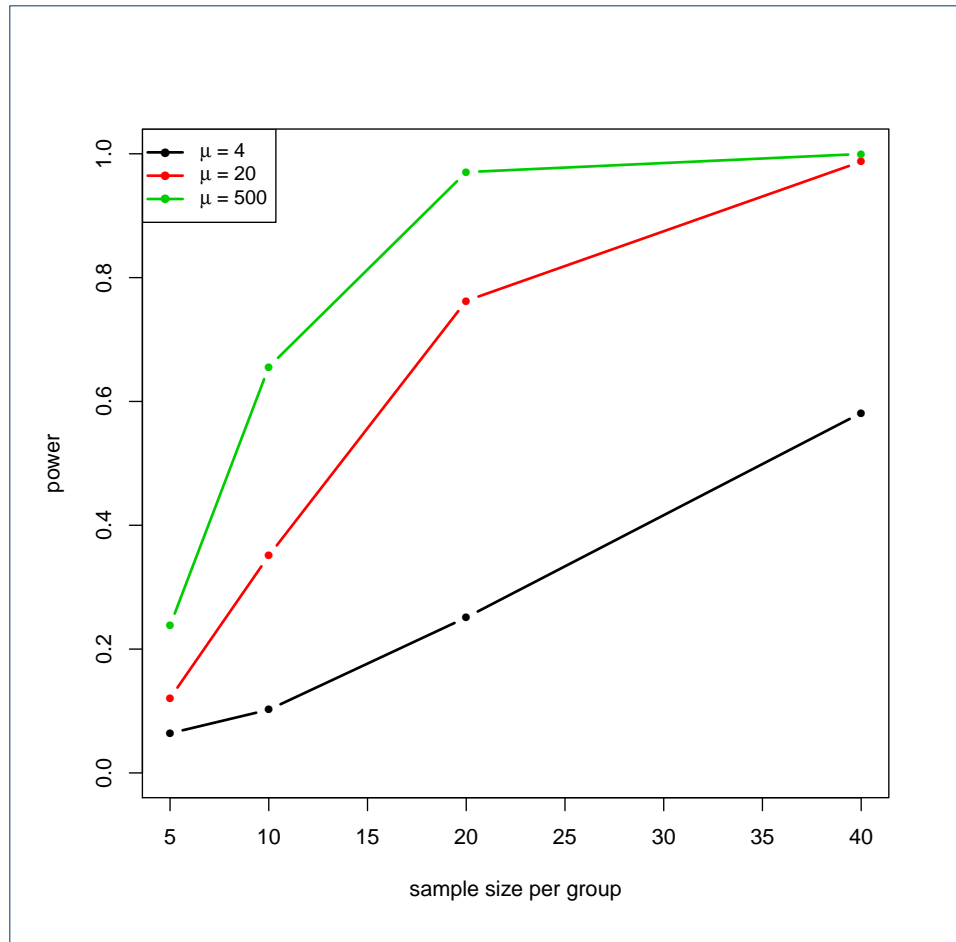

**Figure S29: Power plot at  $\gamma = 2$  for the Wald test with unequal dispersion parameters at  $\alpha = 0.01$ .** Power was calculated at 4 different sample sizes and 3 different expression levels with  $\gamma = 2$  under the alternative hypothesis and  $\alpha = 0.01$ . Power is higher for larger sample sizes and higher expression levels.

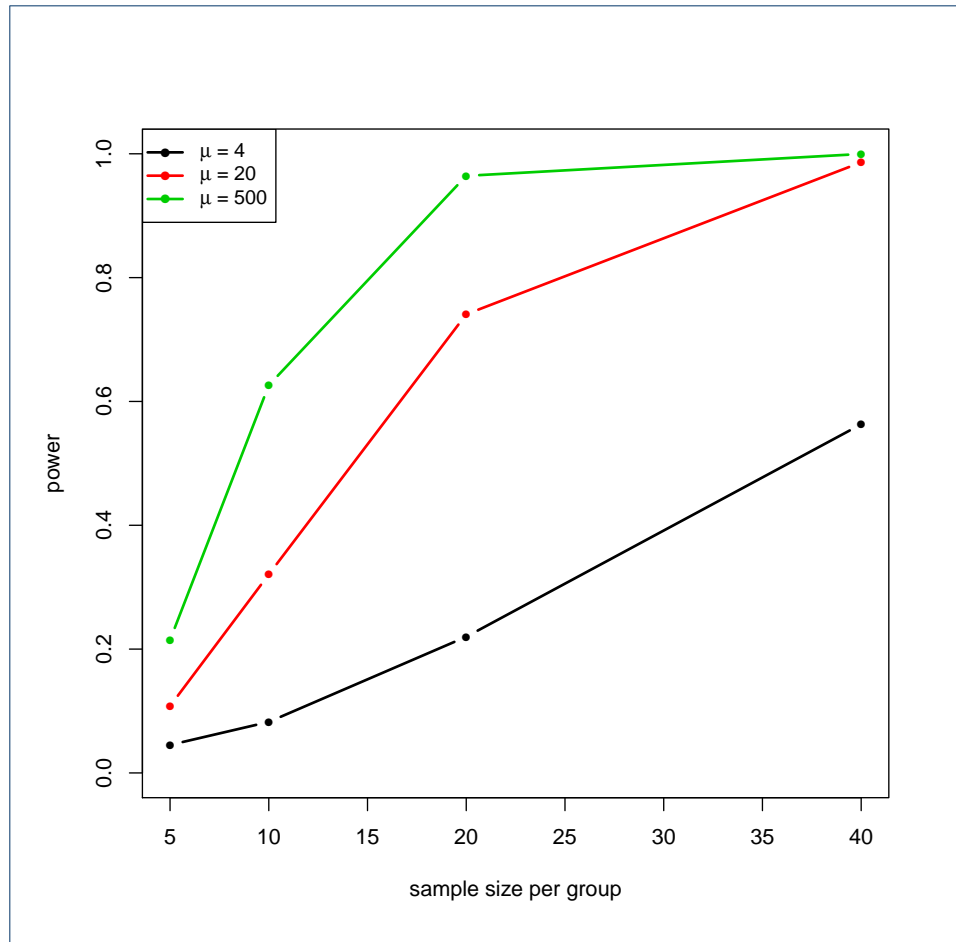

**Figure S30: Power plot at  $\gamma = 2$  for the LRT with unequal dispersion parameters at  $\alpha = 0.01$ .** Power was calculated at 4 different sample sizes and 3 different expression levels with  $\gamma = 2$  under the alternative hypothesis and  $\alpha = 0.01$ . Power is higher for larger sample sizes and higher expression levels.

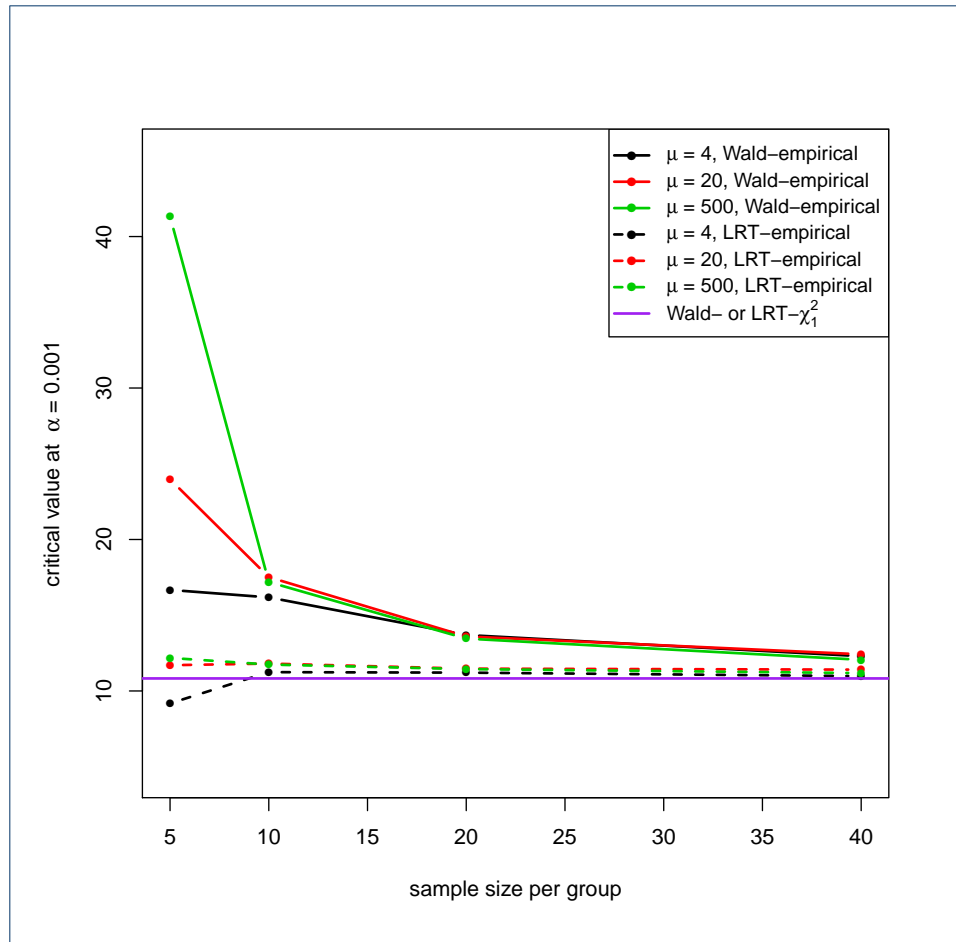

**Figure S31: Critical values plot for both Wald test and LRT with unequal dispersion parameters assuming the high dependency functional form.** Critical values were calculated at the nominal false positive error rate of 0.001 from empirical percentile of null statistics at 3 different mean expression levels for both Wald test (solid line) and LRT (dashed line), and for the chi-square distribution with 1 degree of freedom (purple line). Both Wald test and LRT with the empirical distribution have larger critical values than both Wald test and LRT with the chi-square distribution.

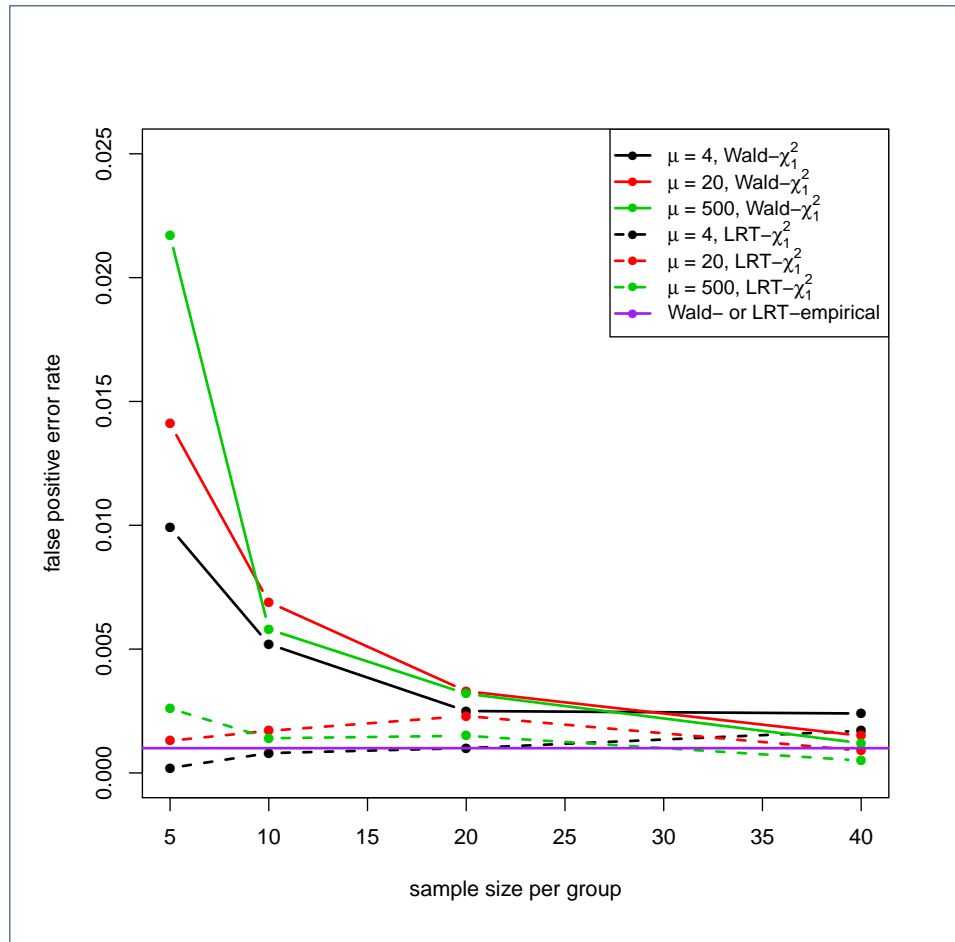

**Figure S32: False positive error rate plot for both Wald test and LRT with unequal dispersion parameters assuming the high dependency functional form.** False positive error rate was calculated for both Wald test (solid line) and LRT (dashed line) following a chi-square distribution with 1 degree of freedom at 3 different mean expression levels. The nominal false positive error rate for both Wald and LRT with the empirical distribution is shown in purple line ( $\alpha = 0.001$ ). Both tests with the chi-square distribution have the inflated false positive error rates.



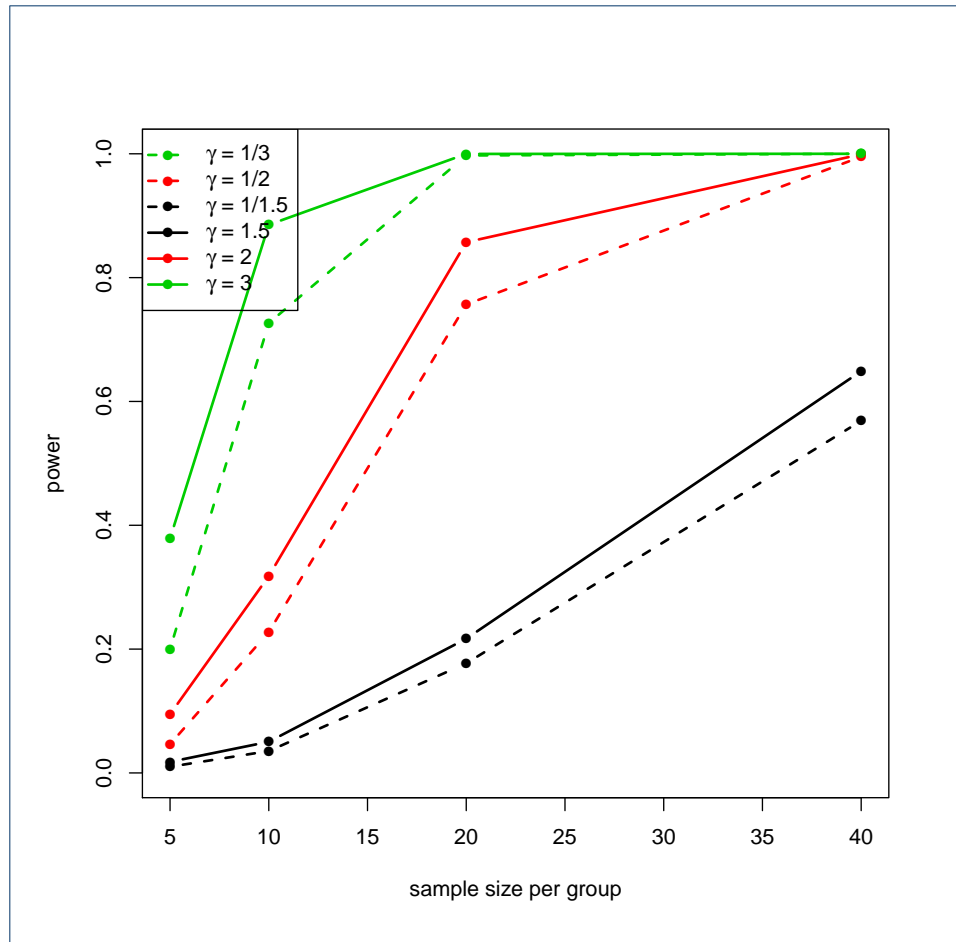

**Figure S33: Power plot at  $\mu = 20$  for the Wald test with unequal dispersion parameters assuming the high dependency functional form.** Power was calculated at 4 different sample sizes and 6 different fold changes under the alternative hypothesis with  $\mu = 20$  and  $\alpha = 0.001$ . Power is higher for larger sample sizes and higher absolute fold changes.

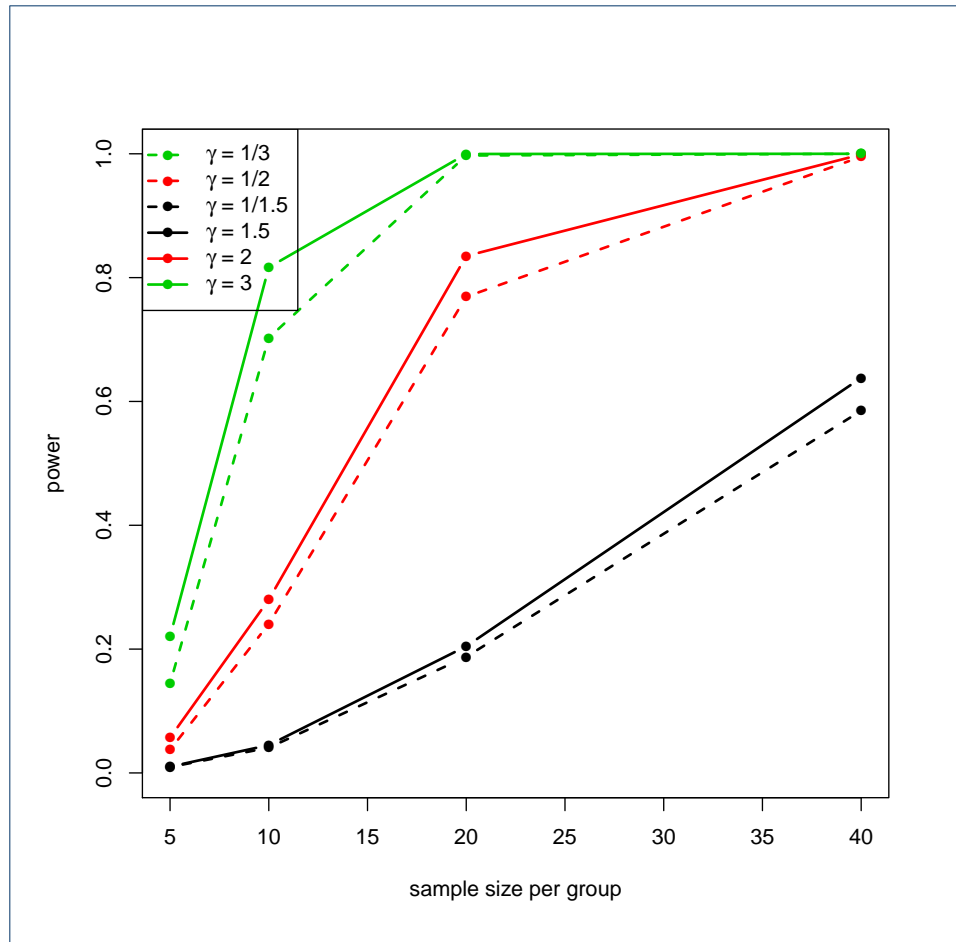

**Figure S34: Power plot at  $\mu = 20$  for the LRT with unequal dispersion parameters assuming the high dependency functional form.** Power was calculated at 4 different sample sizes and 6 different fold changes under the alternative hypothesis with  $\mu = 20$  and  $\alpha = 0.001$ . Power is higher for larger sample sizes and higher absolute fold changes.

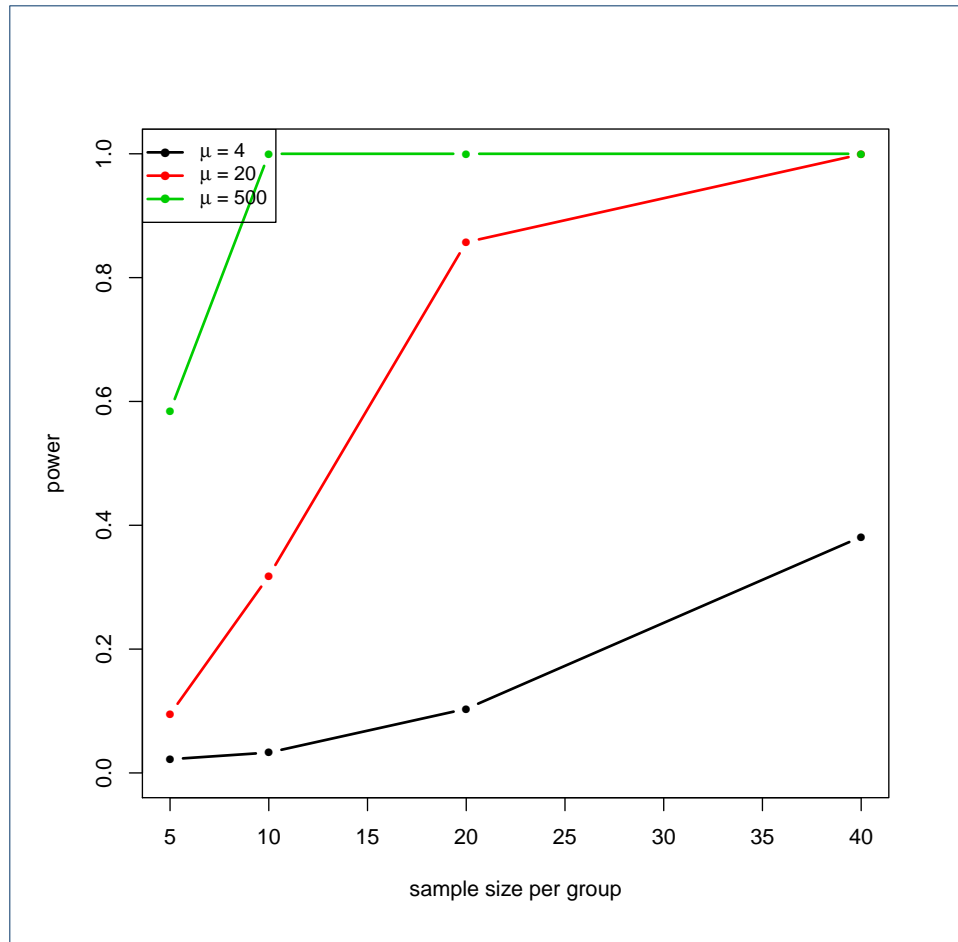

**Figure S35: Power plot at  $\gamma = 2$  for the Wald test with unequal dispersion parameters assuming the high dependency functional form.** Power was calculated at 4 different sample sizes and 3 different expression levels with  $\gamma = 2$  under the alternative hypothesis and  $\alpha = 0.001$ . Power is higher for larger sample sizes and higher expression levels.

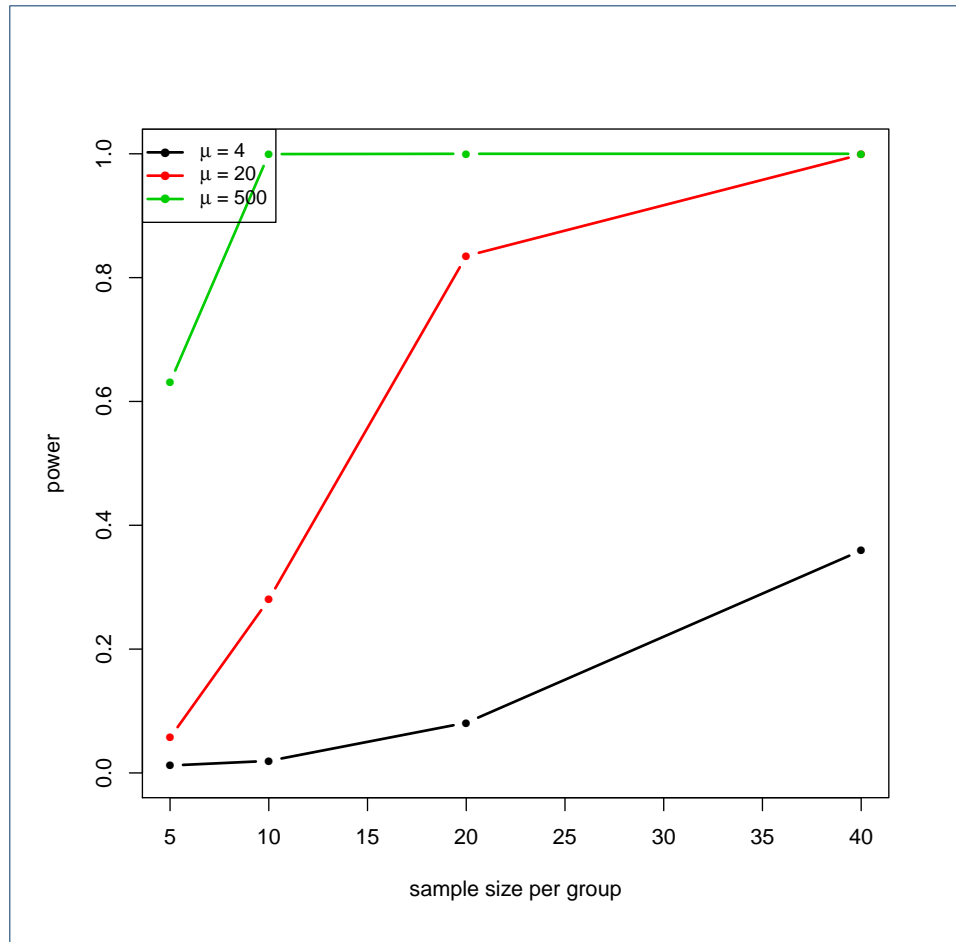

**Figure S36: Power plot at  $\gamma = 2$  for the LRT with unequal dispersion parameters assuming the high dependency functional form.** Power was calculated at 4 different sample sizes and 3 different expression levels with  $\gamma = 2$  under the alternative hypothesis and  $\alpha = 0.001$ . Power is higher for larger sample sizes and higher expression levels.

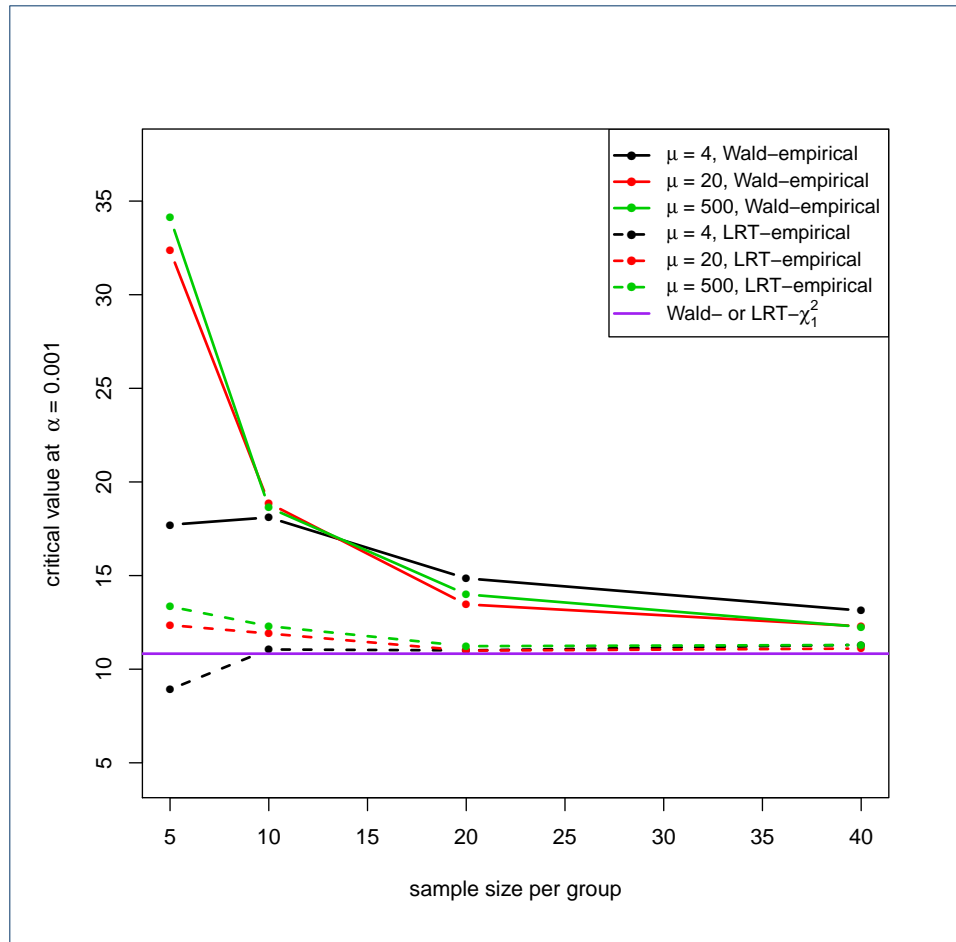

**Figure S37: Critical values plot for both Wald test and LRT with unequal dispersion parameters assuming the low dependency functional form.** Critical values were calculated at the nominal false positive error rate of 0.001 from empirical percentile of null statistics at 3 different mean expression levels for both Wald test (solid line) and LRT (dashed line), and for the chi-square distribution with 1 degree of freedom (purple line). Both Wald test and LRT with the empirical distribution have larger critical values than both Wald test and LRT with the chi-square distribution.

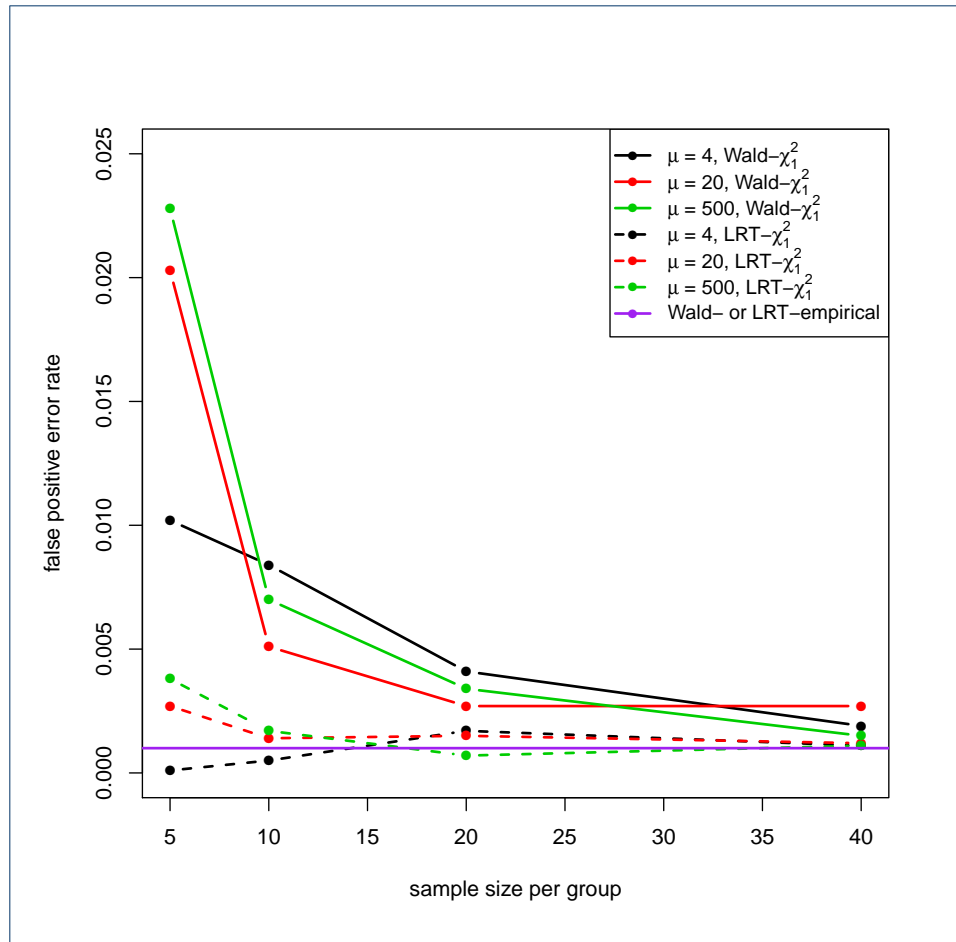

**Figure S38: False positive error rate plot for both Wald test and LRT with unequal dispersion parameters assuming the low dependency functional form.** False positive error rate was calculated for both Wald test (solid line) and LRT (dashed line) following a chi-square distribution with 1 degree of freedom at 3 different mean expression levels. The nominal false positive error rate for both Wald and LRT with the empirical distribution is shown in purple line ( $\alpha = 0.001$ ). Both tests with the chi-square distribution have the inflated false positive error rates.

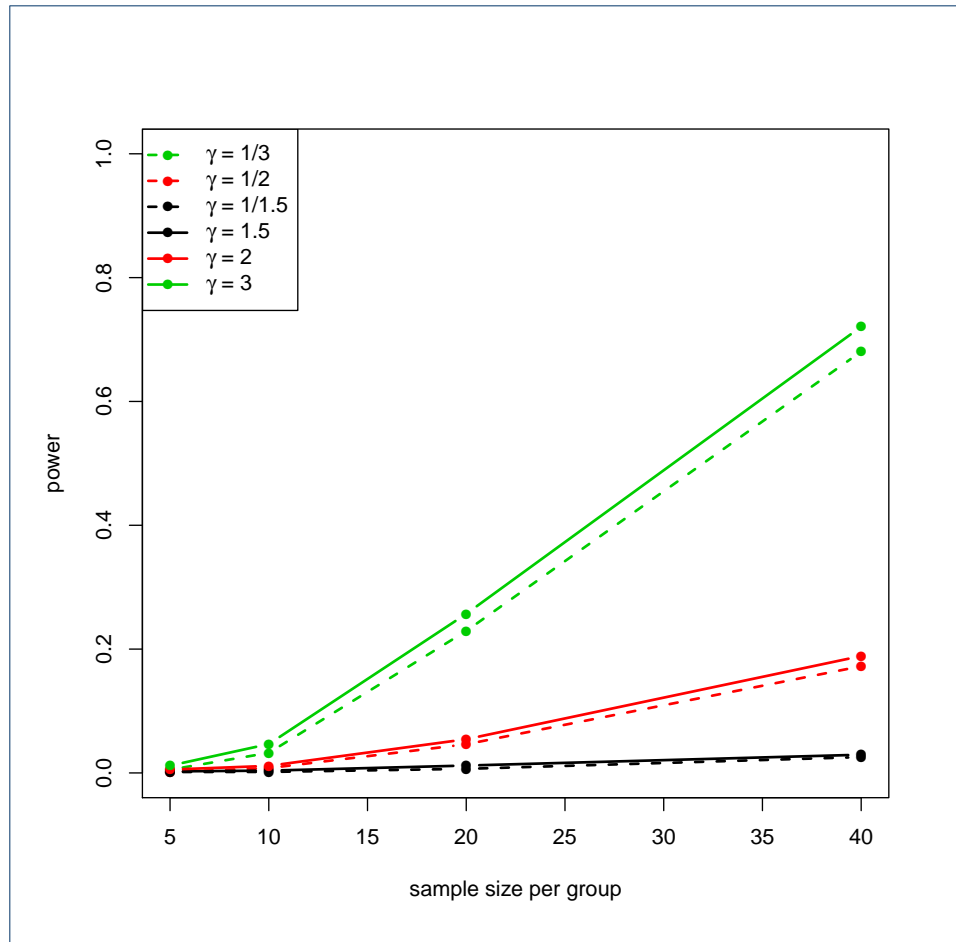

**Figure S39: Power plot at  $\mu = 20$  for the Wald test with unequal dispersion parameters assuming the low dependency functional form.** Power was calculated at 4 different sample sizes and 6 different fold changes under the alternative hypothesis with  $\mu = 20$  and  $\alpha = 0.001$ . Power is higher for larger sample sizes and higher absolute fold changes.

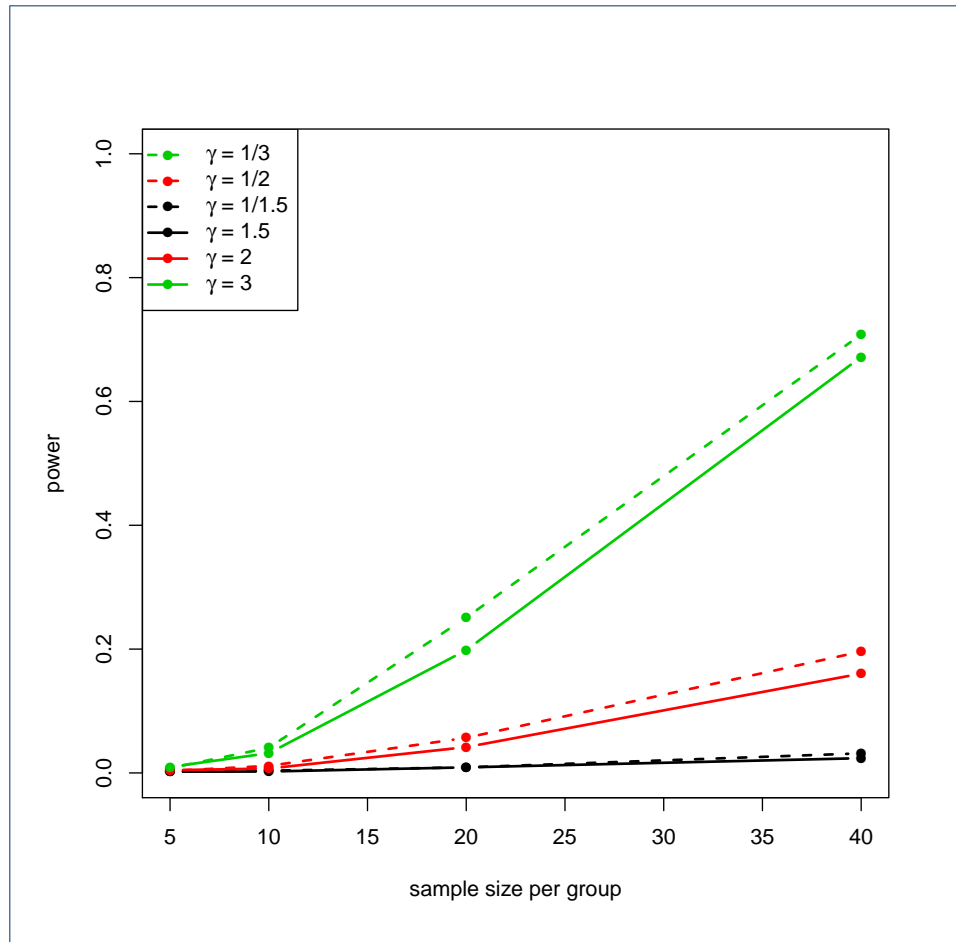

**Figure S40: Power plot at  $\mu = 20$  for the LRT with unequal dispersion parameters assuming the low dependency functional form.** Power was calculated at 4 different sample sizes and 6 different fold changes under the alternative hypothesis with  $\mu = 20$  and  $\alpha = 0.001$ . Power is higher for larger sample sizes and higher absolute fold changes.



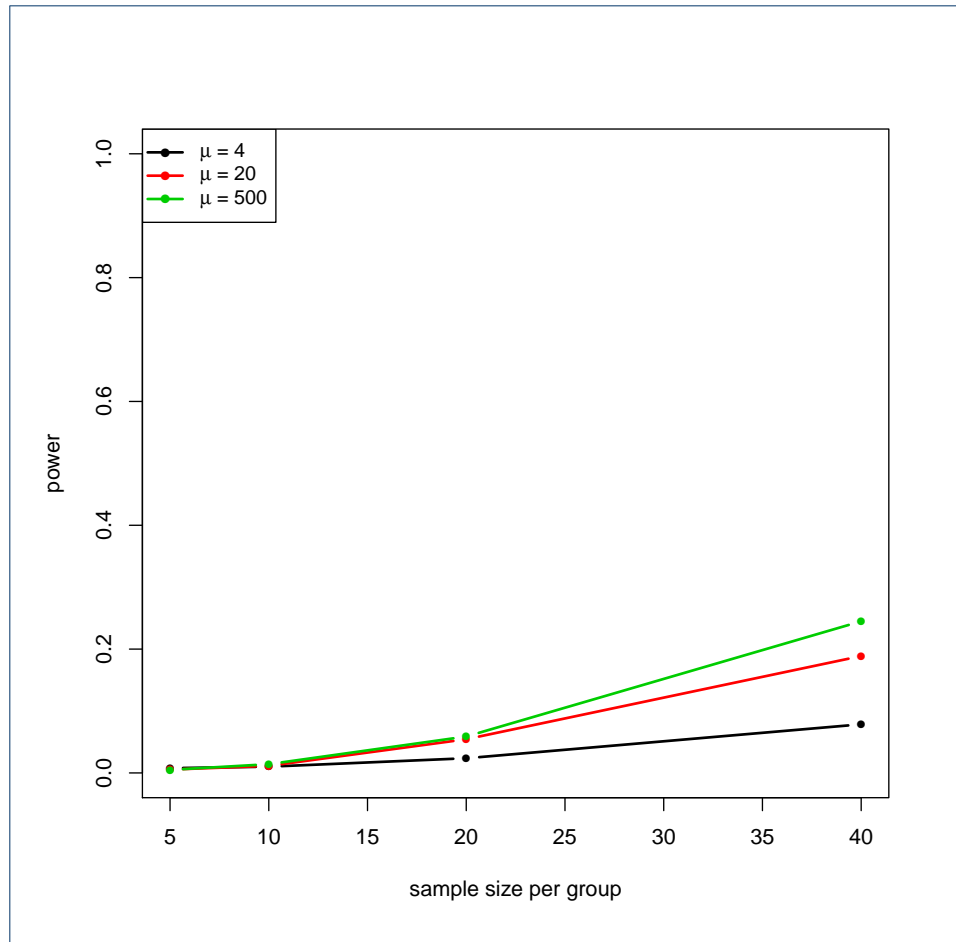

**Figure S41: Power plot at  $\gamma = 2$  for the Wald test with unequal dispersion parameters assuming the low dependency functional form.** Power was calculated at 4 different sample sizes and 3 different expression levels with  $\gamma = 2$  under the alternative hypothesis and  $\alpha = 0.001$ . Power is higher for larger sample sizes and higher expression levels.

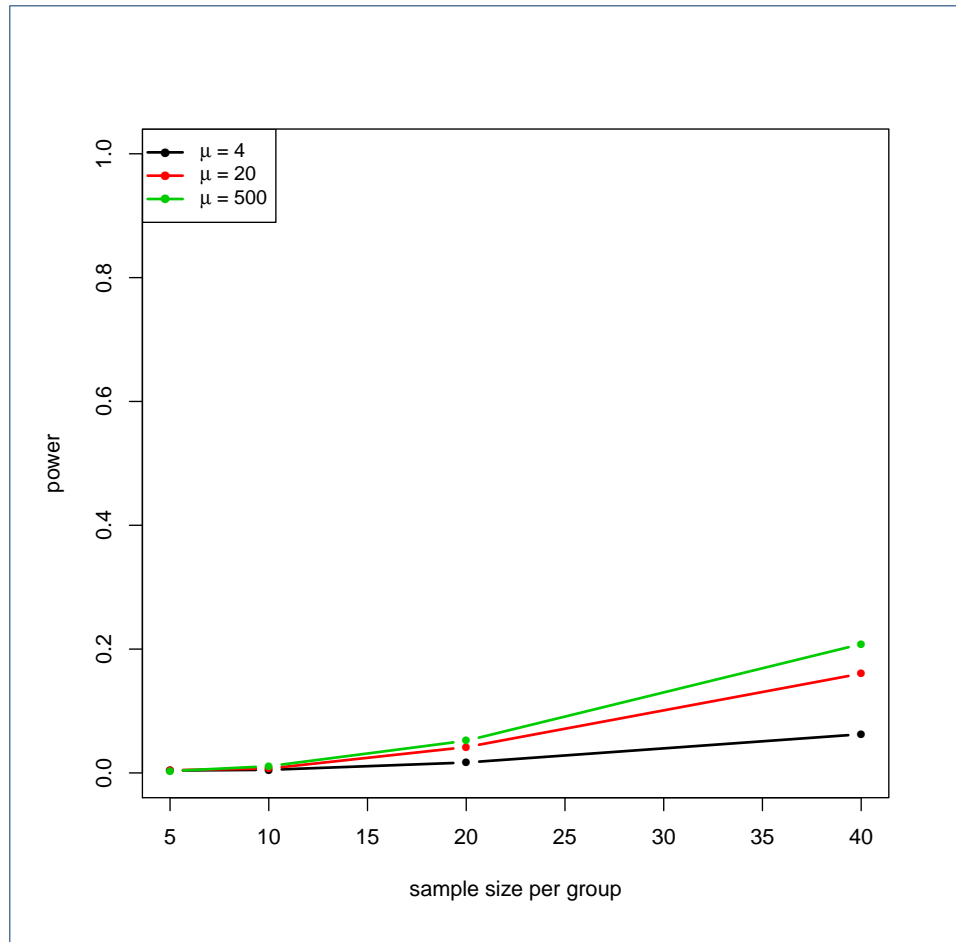

**Figure S42: Power plot at  $\gamma = 2$  for the LRT with unequal dispersion parameters assuming the low dependency functional form.** Power was calculated at 4 different sample sizes and 3 different expression levels with  $\gamma = 2$  under the alternative hypothesis and  $\alpha = 0.001$ . Power is higher for larger sample sizes and higher expression levels.

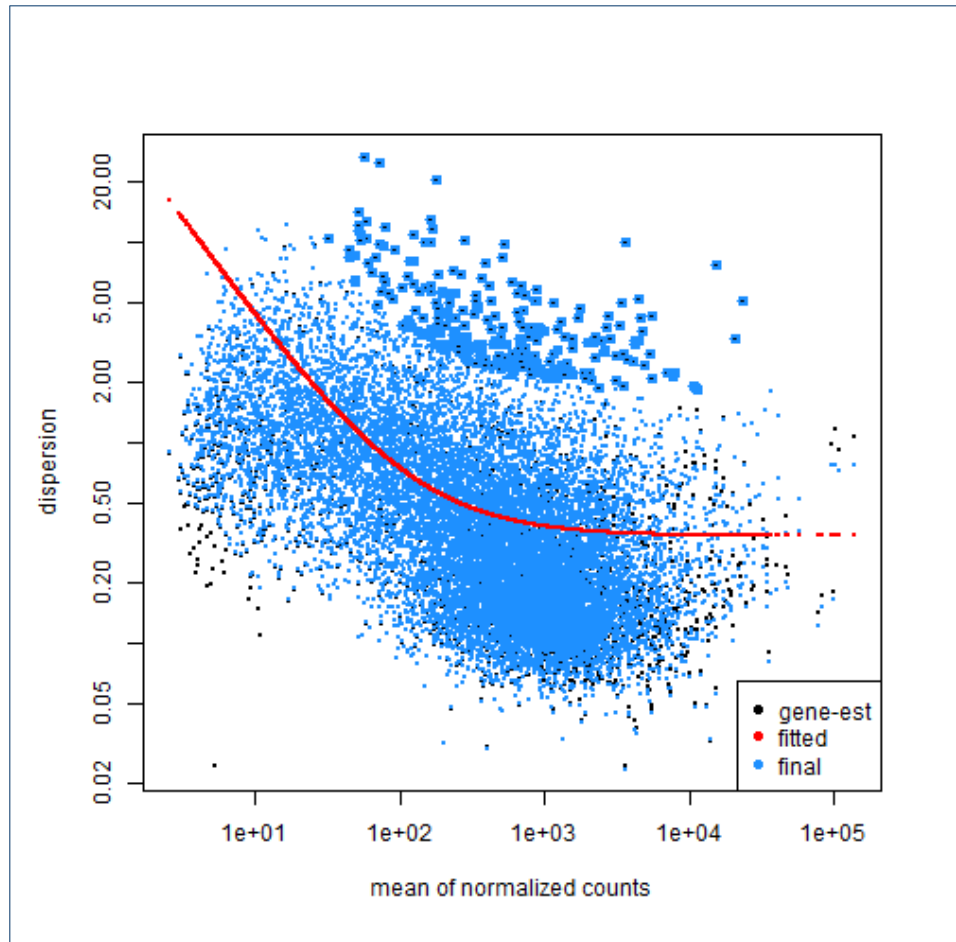

**Figure S43: Mean-dispersion functional form of TCGA breast cancer data set.** *DESeq2* method was applied on the TCGA breast cancer RNA-Seq data set. The plot shows the estimated mean-dispersion function form (red dots) relative to the mean of normalized counts.

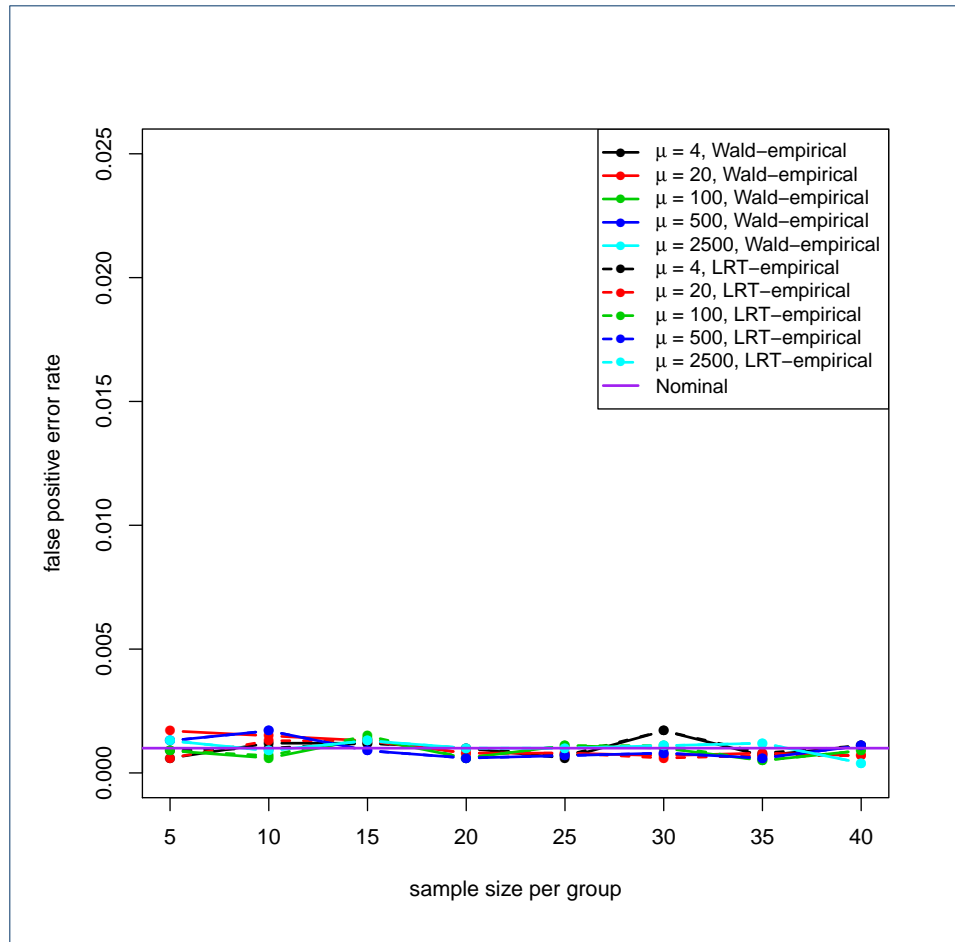

**Figure S44: False positive error rate plot for both Wald test and LRT with equal dispersion parameters.** False positive error rate was calculated for both Wald test (solid line) and LRT (dashed line) at 5 different mean expression levels using the critical values from the empirical distribution of a different simulation. The nominal false positive error rate is shown in purple line ( $\alpha = 0.001$ ).

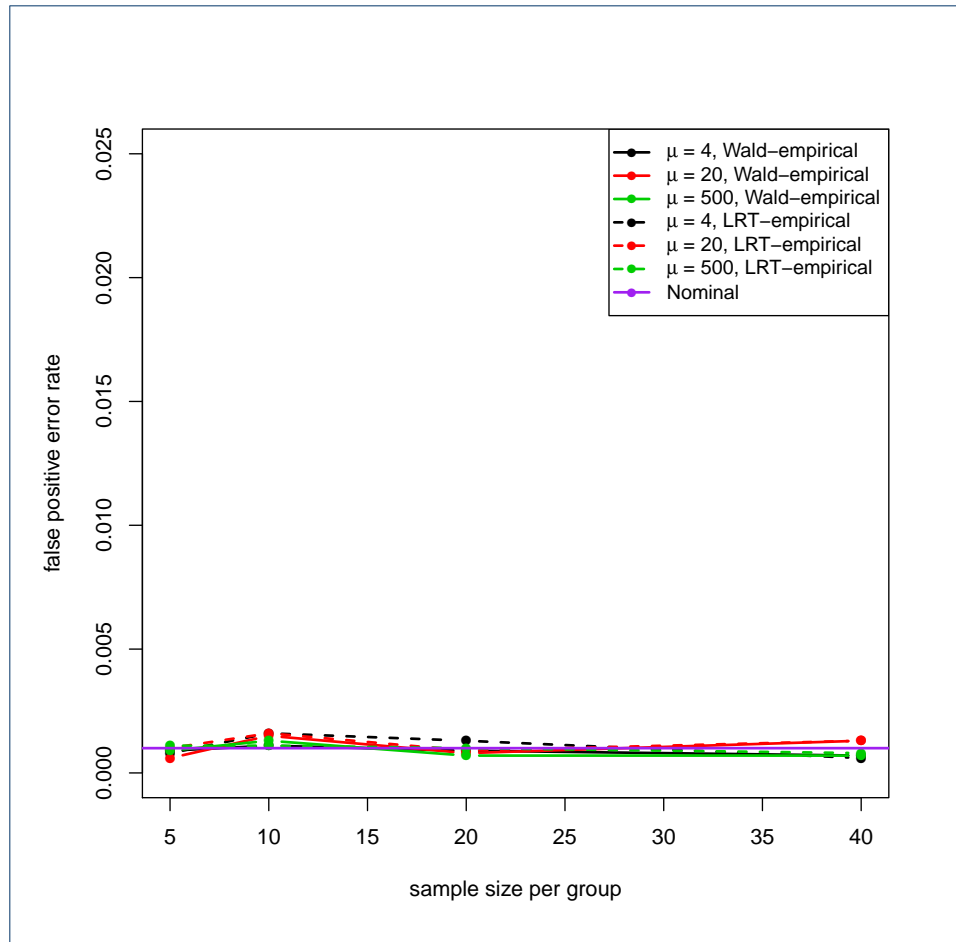

**Figure S45: False positive error rate plot for both Wald test and LRT with unequal dispersion parameters.** False positive error rate was calculated for both Wald test (solid line) and LRT (dashed line) at 5 different mean expression levels using the critical values from the empirical distribution of a different simulation. The nominal false positive error rate is shown in purple line ( $\alpha = 0.001$ ).
